# Supplementary material for: Ponatinib Combined With Rapamycin Causes Regression of Murine Venous Malformation
Source: PubMed Central journal article supplement — Arterioscler Thromb Vasc Biol. 2019 Jan 10;39(3):496–512. doi: 10.1161/ATVBAHA.118.312315 (PMC6392210; doi:10.1161/atvbaha.118.312315), 2019-01-10
Supplement: atv-39-496-s001.pdf [file atv-39-496-s001.pdf]

Supplementary Material for

**Ponatinib combined with rapamycin causes regression of murine Venous Malformation**

**Xian Li<sup>1\*</sup>, Yuqi Cai<sup>1\*</sup>, Jillian Goines<sup>1\*</sup>, Patricia Pastura<sup>2</sup>, Lars Brichta<sup>3</sup>, Adam Lane<sup>4</sup>, Timothy D. Le Cras<sup>2,5</sup>, Elisa Boscolo<sup>1,5#</sup>**

<sup>1</sup>Divisions of Experimental Hematology and Cancer Biology, Cancer and Blood Disease Institute, Cincinnati Children's Hospital Medical Center, Cincinnati, Ohio, 45229 USA

<sup>2</sup> Division of Pulmonary Biology, Cincinnati Children's Hospital Medical Center, Cincinnati, Ohio, 45229 USA

<sup>3</sup> Chemistry Rx- Compounding and Specialty Pharmacy, Philadelphia PA, 19107 USA

<sup>4</sup>Division of Bone Marrow Transplantation and Immune Deficiency, Cancer and Blood Disease Institute, Cincinnati Children's Hospital Medical Center, Cincinnati, Ohio, 45229 USA

<sup>5</sup> Department of Pediatrics, University of Cincinnati College of Medicine, Cincinnati, OH

\* These authors contributed equally to this work

# Corresponding author: [elisa.boscolo@cchmc.org](mailto:elisa.boscolo@cchmc.org)

**The PDF file includes:**

Supplementary results, Supplementary Material and Methods.

Fig. I. Proliferation rates of HUVEC-TIE2-L914F (L914F) and VM-EC.

Fig. II. Specificity of ABL kinase inhibitors Ponatinib, Nilotinib and Bosutinib.

Fig. III. c-ABL and ARG knockdown prevents lumen enlargement in a 3D fibrin gel assay.

Fig. IV. Proliferation inhibition curves in HUVEC-TIE2-L914F treated with ABL kinase inhibitors combined with rapamycin.

Fig. V. Combination treatment with Ponatinib and rapamycin is effective in preventing VM murine lesion expansion.

Fig. VI. Comparison of different reduced dose combination treatments in the VM murine model.

Fig. VII. Effects of reduced dose combination treatment in the formation of VM lesions.

Fig. VIII. Ponatinib combined with rapamycin promotes lesion regression, even at reduced dose.

Fig. IX. Long-term combination treatment of Ponatinib with rapamycin in the murine VM model.

Fig. X. Topical rapamycin treatment prevents lesion rebound.

Fig. XI. Combination treatment with Ponatinib and rapamycin increases apoptosis.

Fig. XII. Combination treatment with Ponatinib and rapamycin reduces vascular area in a 3D fibrin gel assay.

Fig. XIII. Quantification of active signaling pathways in patient-derived VM-EC.

Fig. XIV. Combination treatment with Ponatinib and rapamycin reduces vascular area in a VM patient-derived xenograft model.

Fig. XV. Schematic model of combination therapy for the treatment of VM.

Table I. Cell-based drug screening assay results.

Table II. List of candidate drugs and IC<sub>50</sub> values.

Table III. Combination Index (CI) values.

## Supplementary results:

### **Dose-ranging study of the combination treatment.**

Based on a synergistic anti-proliferative effect *in vitro* (Suppl. fig. IV and Table III), it was reasonable to test combination of rapamycin and Ponatinib *in vivo*. After injection of HUVEC-TIE2-L914F cells, mice were treated with vehicle, rapamycin, Ponatinib or combination for 15 days. At day16 (Suppl. fig. V), in Ponatinib or rapamycin monotherapy groups, VM lesion size was smaller than vehicle and untreated mice. Moreover, VM lesion size was decreased after combination treatment when compared to vehicle or non-treatment but also when compared to Ponatinib or rapamycin monotherapy groups. Lesion weight was also lower in the combination group compared to the vehicle or Ponatinib groups (Suppl. fig. V). Analysis of the H&E staining in the lesion explants showed that the drug combination prevented HUVEC-TIE2-L914F cells to form enlarged lumen in VM lesions (Suppl. fig. V). There was a trend to decreased mouse weight in the combination group compared to vehicle group, which suggested this dose of combination treatment may induce some side effects (Suppl. fig. V). For this reason, we tested two different reduced dose combinations (RD1 Combo; 20mg/kg Ponatinib + 1mg/kg rapamycin and RD2 Combo; 10mg/kg Ponatinib + 0.5mg/kg rapamycin) in the VM murine model. As shown in Suppl. figs. VI and VI, lesion size of RD1 Combo was smaller than vehicle, Ponatinib or rapamycin group at day 16. Conversely, lesion size in RD2 Combo group was similar to Ponatinib alone. RD1 Combo treatment, but not RD2 Combo, induced notable reduction in lesion weight (Suppl. fig. VI) and vascular area compared to vehicle or monotherapy group (Suppl. figs. VI and VI). Furthermore, there was no difference in mouse weight between RD1 Combo or RD2 Combo treatment and vehicle groups (Suppl. fig. VI).

### **Drug combination inhibits formation of HUVEC-TIE2-L914F-derived VM.**

To compare the efficacy of combination and reduced dose combination, mice were injected with HUVEC-TIE2-L914F cells and at the same time, given vehicle, Ponatinib (30mg/kg), rapamycin (2mg/kg), combination and RD Combo (20mg/kg Ponatinib + 1mg/kg rapamycin). After 15 days of treatment, lesion size and lesion weight in both the combination and RD Combo groups were smaller compared to monotherapy and vehicle treated groups (Suppl. fig. VII). H&E staining of lesion explants showed that both combination and RD Combo prevented vessel enlargement (Suppl. fig. VII). These results suggest that: 1-drug combination is more effective than monotherapy; 2-reduced dose drug combination achieved similar effect on lesion expansion inhibition. We next evaluated the efficacy of combination and RD1 Combo in inducing VM lesion regression (see manuscript Fig. 2 and Suppl. fig.VIII and IX).

## **Supplementary Material and Methods:**

### **Apoptosis (cleaved caspase-3 staining)**

HUVEC-TIE2-L914F were seeded in Millicell® EZ SLIDE 4-well glass slides (EMD Millipore), and were treated by DMSO, Ponatinib, rapamycin or combination for 72 hours. Then slides were stained with AlexaFluor® 647 conjugated cleaved-caspase 3 (Cell signaling) to detect cell apoptosis. Nuclei were stained with 4',6- diamidino-2-phenylindole (DAPI).

### **VM patient-derived cell xenograft model**

After cell expansion,  $3.5 \times 10^6$  patient-derived VM-EC were suspended in Matrigel™ and injected subcutaneously (s.c.) on both flanks of 6-7 weeks old male athymic nu/nu mice. When most lesions turned red in appearance and average lesion size in each group exceeded  $70 \text{ mm}^2$ , animals received oral gavage daily of 200µl vehicle (Citric buffer pH 2.5; 25mM – Ethanol 30% (v/v) solution), rapamycin (2mg/kg) or reduced combination (20mg/kg Ponatinib + 1mg/kg rapamycin) for 14 days. Size of lesions ( $\text{mm}^2$ ) was measured with a caliper. Lesions were dissected, fixed in 10% formalin and processed for paraffin embedding. After Hematoxylin and Eosin (H&E) staining of paraffin sections, 5 images were taken randomly per section, then vessel density (Total vessels/lesion) was quantified with ImageJ software.

## Supplementary Figures:

**A**

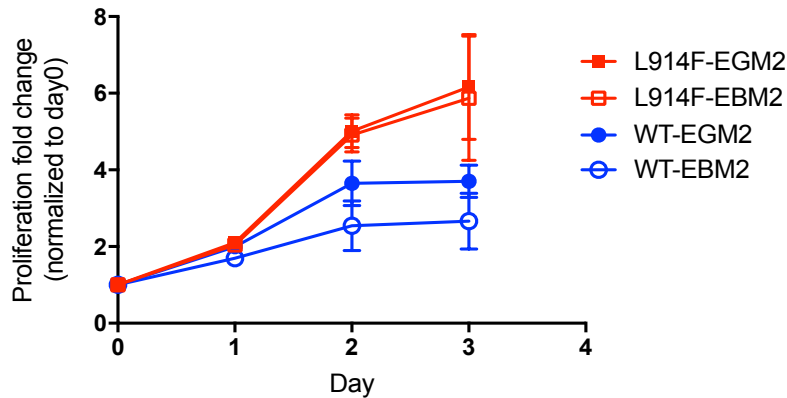

**B**

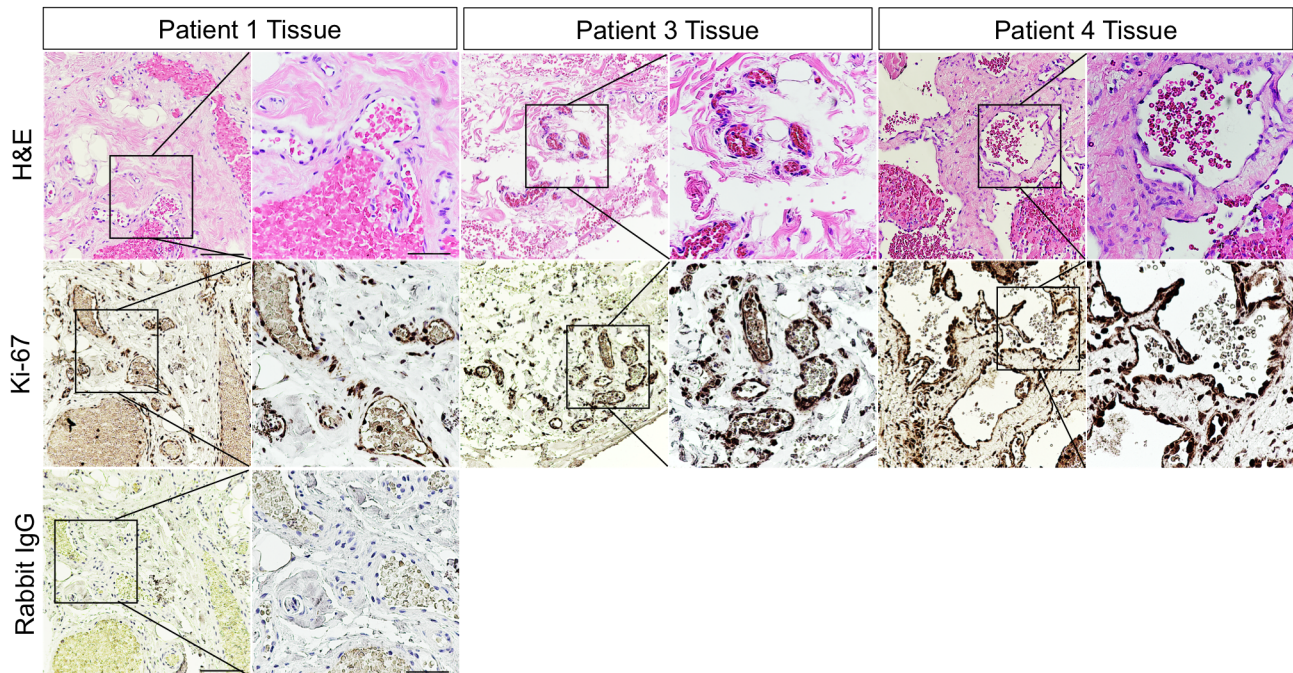

### Supplemental figure I. Proliferation rates of HUVEC-TIE2-L914F (L914F) and VM-EC.

**A.** Cells were seeded at day -1 and fixed at day0, day1, day2 and day3 separately and OD values were read at 540 nm. Proliferation rate was normalized to day 0. EGM2: Endothelial Growth Factor Medium/20% FBS, EBM2: Endothelial Basal Medium (no growth factors). **B.** Patient tissue stained for hematoxylin and eosin (H&E) (top), Ki-67 (dark brown) (middle) and control rabbit IgG (bottom). Patient#1 and #3 tissue showed expression of the TIE2-L914F mutation. Scale bar: 100 $\mu$ m (left) and 50 $\mu$ m (right).

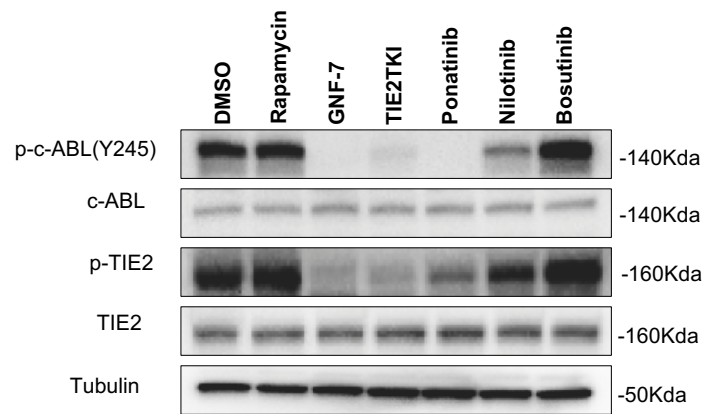

**Supplemental figure II. Specificity of ABL kinase inhibitors Ponatinib, Nilotinib and Bosutinib.** Western blotting analysis of HUVEC-TIE2-L914F with indicated antibodies. Cells were treated with DMSO (Control), rapamycin (15nM), GNF-7 (30nM), TIE2 tyrosine kinase inhibitor (TIE2-TKI) (10μM), Ponatinib (300nM), Nilotinib (10μM), or Bosutinib (10μM), for 1h.

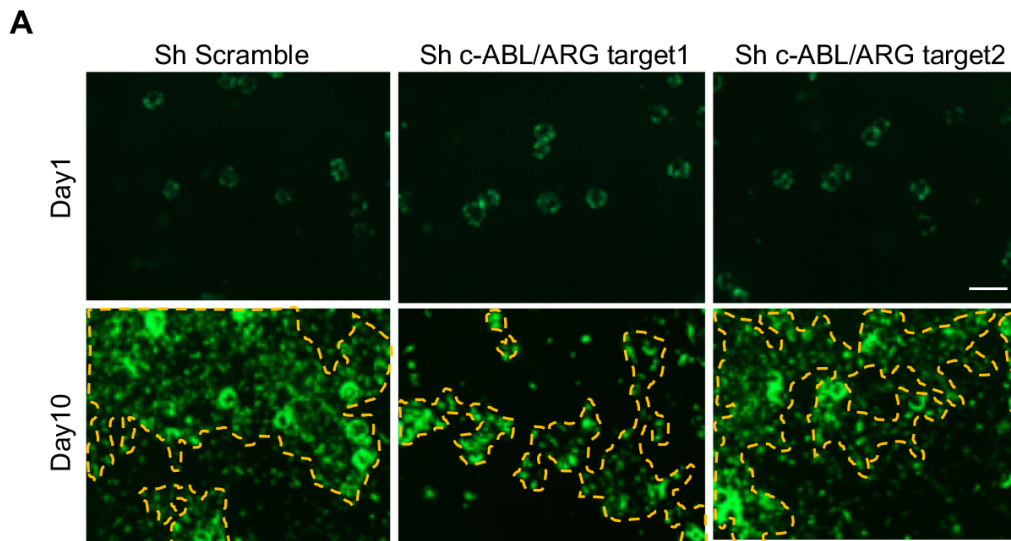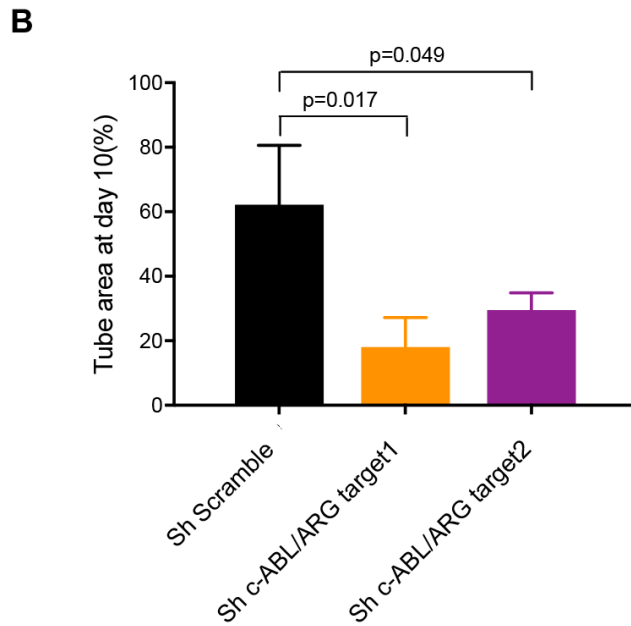

**Supplemental figure III. c-ABL and ARG knockdown prevents lumen enlargement in a 3D fibrin gel assay.**

**A.** Representative images of HUVEC-TIE2-L914F-GFP tube network formation taken on the same field at day 1 and day 10. Scale bar=200 $\mu$ m. **B.** Quantification of the tube area at day 10. Data expressed as mean  $\pm$  SD, n=3.

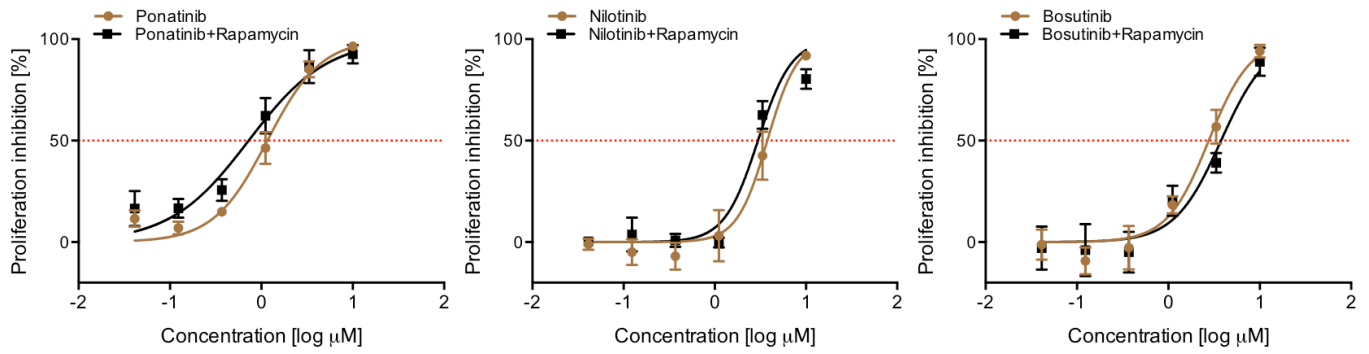

**Supplemental figure IV. Proliferation inhibition curves in HUVEC-TIE2-L914F treated with ABL kinase inhibitors combined with rapamycin.**

HUVEC-TIE2-L914F were treated with different concentrations (from 10μM to 0.03μM) of Ponatinib, Nilotinib or Bosutinib alone or in the presence of rapamycin at 10 nM for 72 h. Combination-rapamycin: rapamycin inhibition effect is deducted from the combination curve. Data expressed as mean ± SD, n=4.

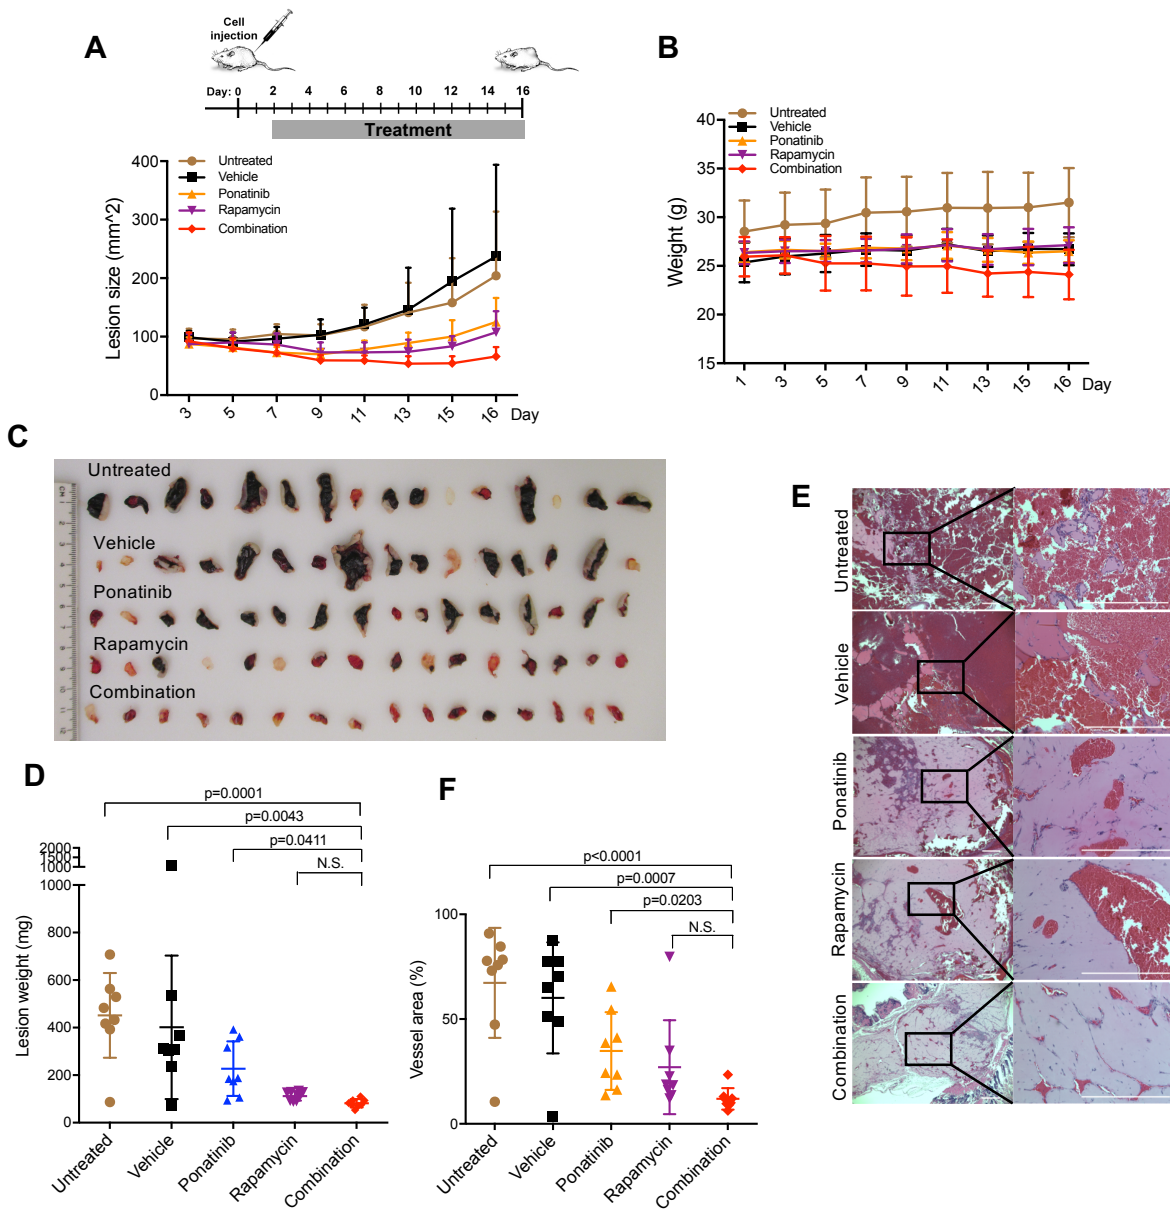

**Supplemental figure V. Combination treatment with Ponatinib and rapamycin is effective in preventing VM murine lesion expansion.**

**A.** HUVEC-TIE2-L914F injected nude mice were treated by oral gavage every day with vehicle, Ponatinib (30mg/kg), rapamycin (2mg/kg) or combination starting at day 1 for 15 days. Lesion size measured by caliper every 2 days until day16. Data expressed as mean  $\pm$  SD (n = 8 mice with 2 lesions/group). **B.** Mouse weight measured every 2 days until day16. Data expressed as mean  $\pm$  SD (n = 8 mice/group). **C.** Overview of lesions. **D.** Quantification of lesion weight. **E.** Representative H&E stained sections. Scale bar: 500 $\mu$ m. **F.** Quantification of vessel area. In D and F data expressed as average value for 2 lesions on each mouse, mean shown by horizontal bars, one-way Anova for multiple comparisons (n = 8 mice).



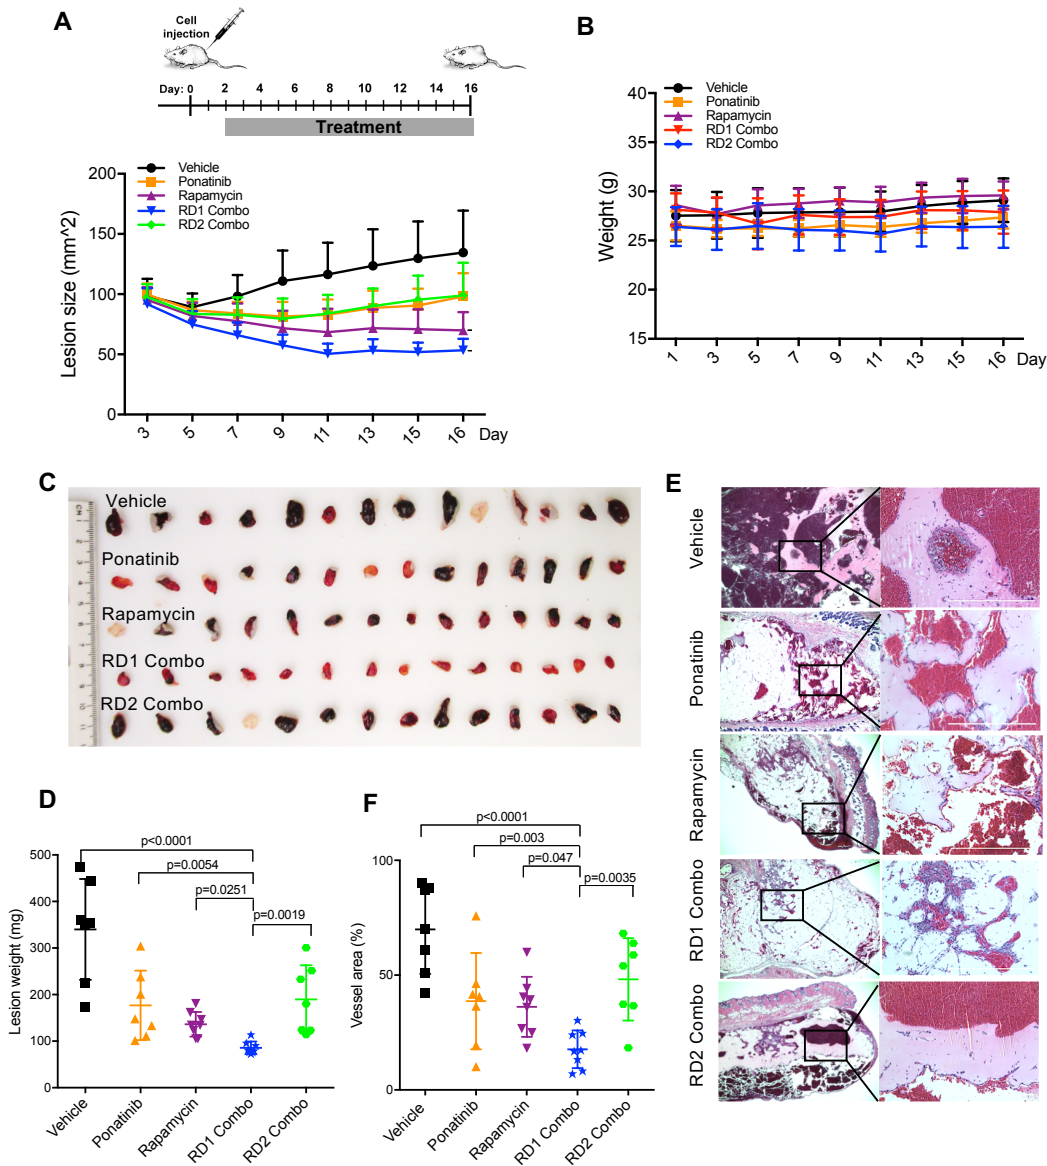

### Supplemental figure VI. Comparison of different reduced dose combination treatments in the VM murine model.

**A.** HUVEC-TIE2-L914F injected mice were treated by oral gavage every day starting day 1 with vehicle, Ponatinib (30mg/kg), rapamycin (2mg/kg) or reduced dose 1 combination (RD1 Combo, Ponatinib 20mg/kg/day and rapamycin 1mg/kg) or reduced dose 2 combination (RD2 Combo, Ponatinib 10mg/kg/day and rapamycin 0.5mg/kg) for 15 days. Lesion size measured by caliper every 2 days until day 16. Data expressed as mean  $\pm$  SD (n = 8 mice with 2 lesions/group). **B.** Mouse weight measured every 2 days until day 16. Data expressed as mean  $\pm$  SD (n = 8 mice/group). **C.** Overview of lesions. **D.** Quantification of lesion weight. **E.** Representative H&E stained sections. Scale bar: 500 $\mu$ m. **F.** Quantification of vessel area. In D and F data expressed as average value for 2 lesions on each mouse, mean shown by horizontal bars, one-way Anova for multiple comparisons (n = 8 mice).

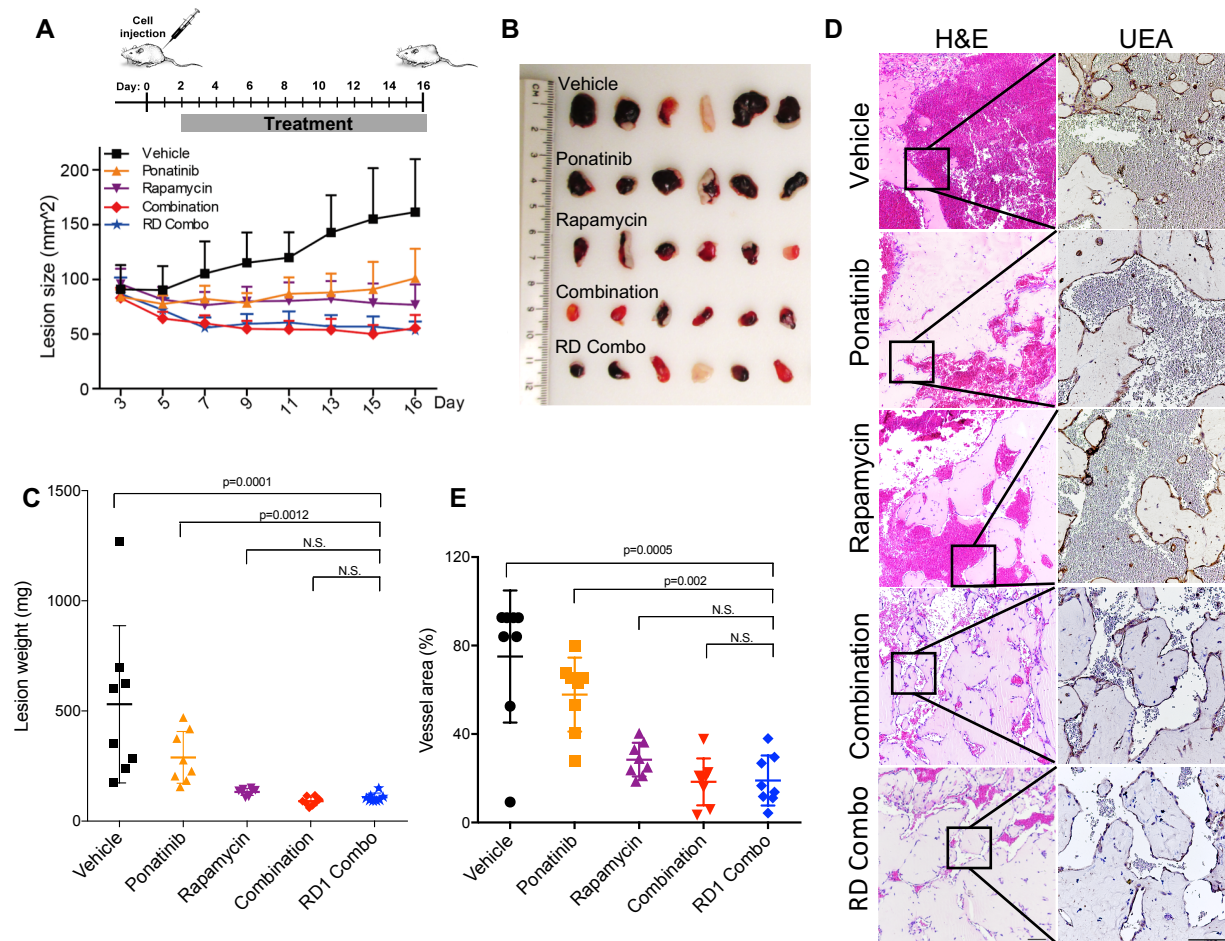

**Supplemental figure VII. Effects of reduced dose combination treatment in the formation and expansion of VM lesions.**

**A.** HUVEC-TIE2-L914F injected mice were treated by oral gavage daily from day 1 to day 15 with vehicle, Ponatinib (30mg/kg), rapamycin (2mg/kg), combination or reduced dose combination (RD Combo: Ponatinib 20mg/kg/day and rapamycin 1mg/kg). Lesions were measured by caliper every 2 days. Data expressed as mean  $\pm$  SD (n = 8 mice with 2 lesions/group). **B.** Representative images of lesions. **C.** Lesion weight. **D.** Representative H&E stained sections. Scale bar: 500 $\mu$ m. **E.** Quantification of vessel area. In C and E data expressed as average value for 2 lesions on each mouse, mean shown by horizontal bars, one-way Anova for multiple comparisons (n = 8 mice).

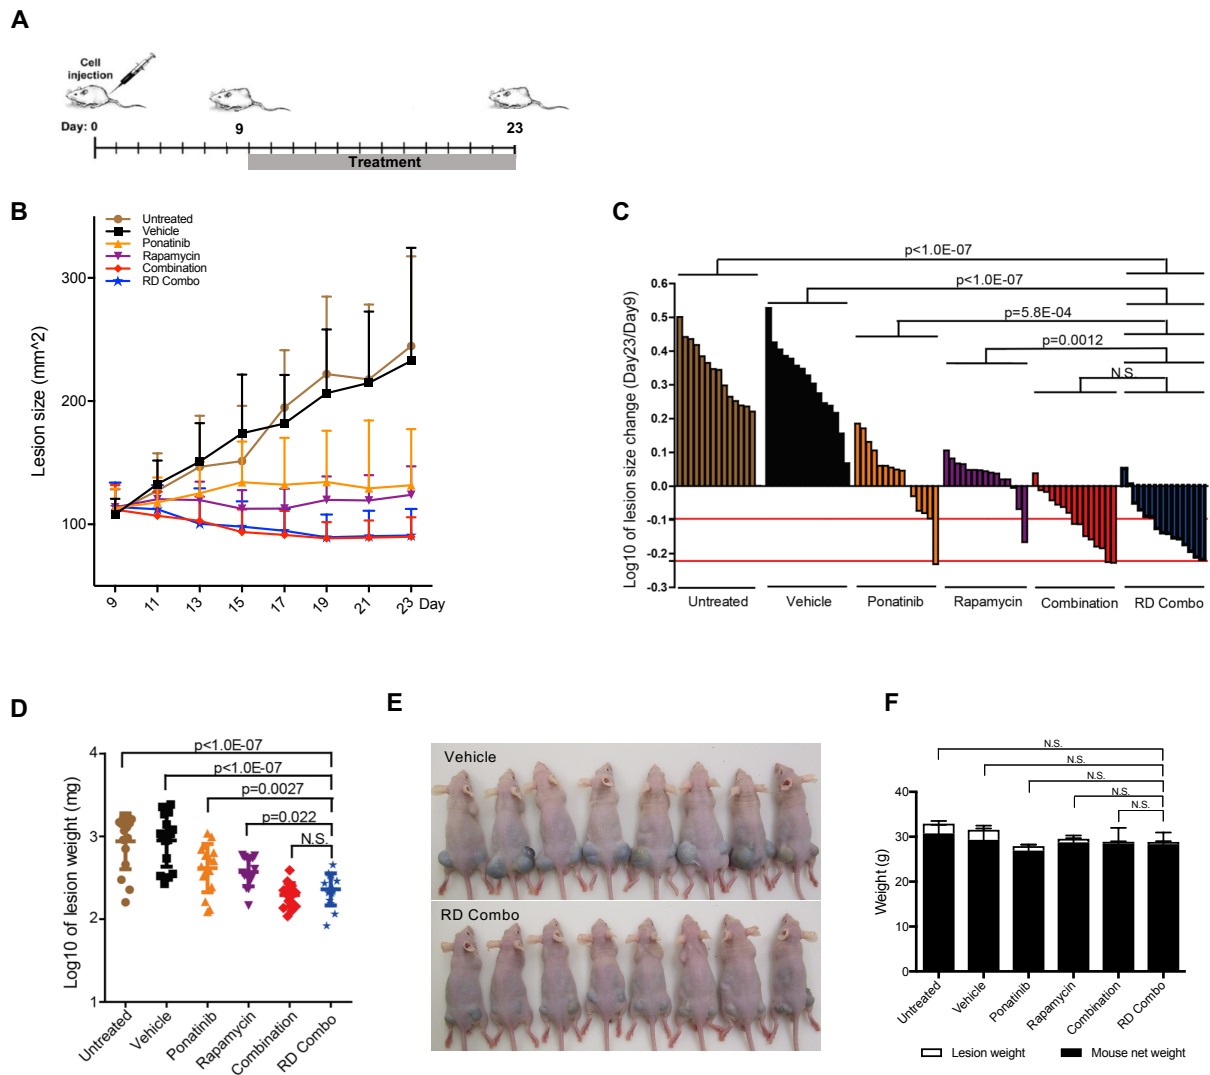

### Supplemental figure VIII. Ponatinib combined with rapamycin promotes lesion regression, even at reduced dose.

**A.** Treatment scheme. When average VM lesion reached 110mm<sup>2</sup> (day 9), HUVEC-TIE2-L914F injected mice were treated daily by oral gavage with vehicle, Ponatinib(30mg/kg), rapamycin(2mg/kg), combination or reduced dose combination (RD Combo) (Ponatinib 20mg/kg/day and rapamycin 1mg/kg) for 14 days. **B.** Lesion size measured every 2 days. Data expressed as mean ± SD (n = 8 mice with 2 lesions/group). **C.** Waterfall plot of Log<sub>10</sub> of lesion size change (Day23/Day9). Data expressed as single value for each lesion, linear mixed model effect (n = 8 mice with 2 lesions/group). **D.** Log<sub>10</sub> of lesion weight. Data expressed as mean ± SD, linear mixed model effect (n = 8 mice with 2 lesions/group). **E.** Images of mice bearing lesions. **F.** Quantification of mouse body weight at day 23. In long-term experiments HUVEC TIE2-L914F formed very large VM lesions in untreated and vehicle groups compared to treated groups. Mouse and lesion weight were measured at day 23, then mouse net body weight was calculated by subtracting lesion weight from the total mouse weight. Mouse weight loss during the treatment was not noted. Data expressed as mean ± SD (n = 8 mice/group).

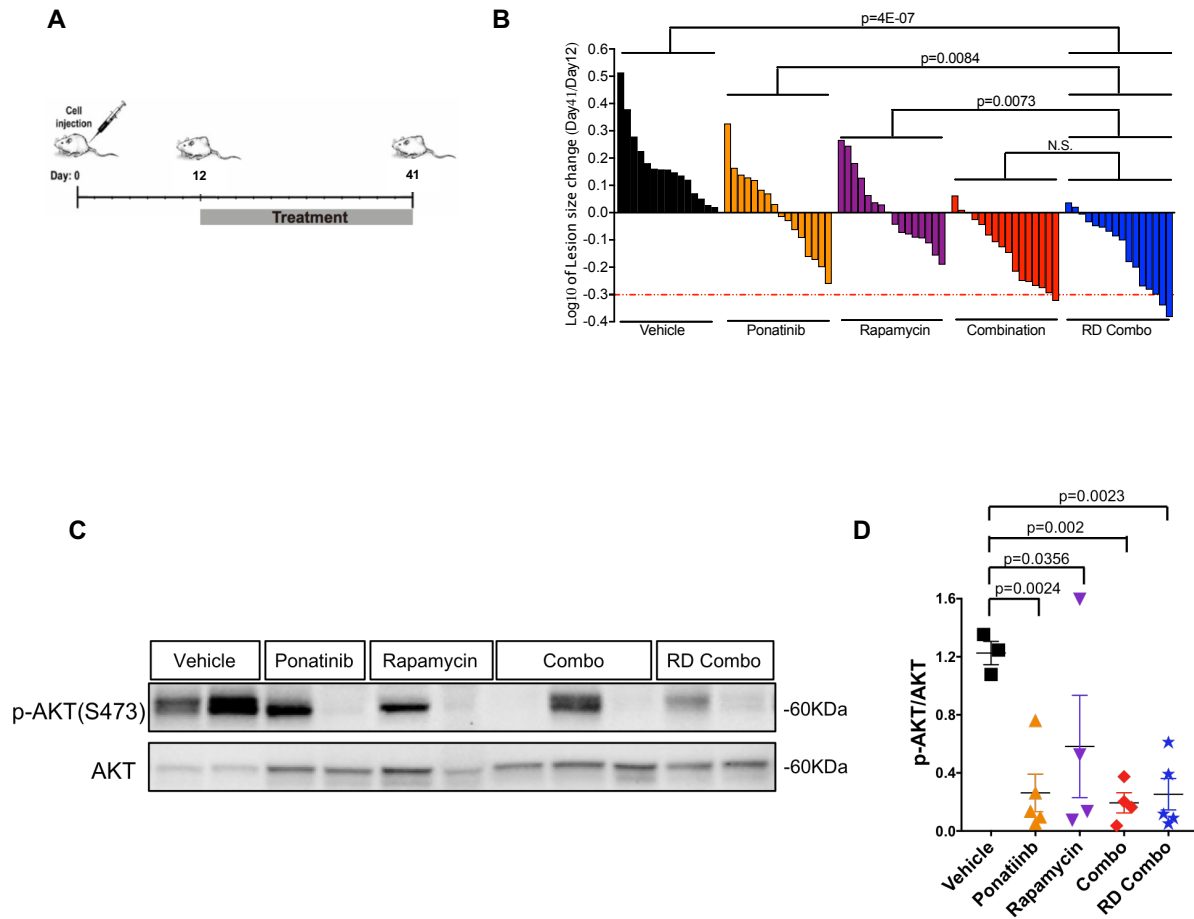

### Supplemental figure IX. Long-term combination treatment of Ponatinib with rapamycin in the murine VM model.

**A.** Treatment scheme. When average VM lesion in each group reached 130mm<sup>2</sup> (day12), HUVEC TIE2-L914F injected mice were treated by oral gavage every day with vehicle, Ponatinib(30mg/kg), rapamycin(2mg/kg), combination or reduced dose combination (RD Combo) (Ponatinib 20mg/kg/day and rapamycin 1mg/kg) for 28 days. **B.** Waterfall plot of Log10 of lesion size change (Day41/Day12). Data expressed as single value for each lesion, linear mixed effect model (n = 8 mice with 2 lesions/group, one lesion in vehicle group was broken at day34 and is not shown). **C.** Representative immunoblot for p-AKT(Ser473) and total AKT in VM lesions. **D.** Quantification of p-AKT/AKT ratio from n=3-5 lesions/group, one-way Anova for multiple comparisons.

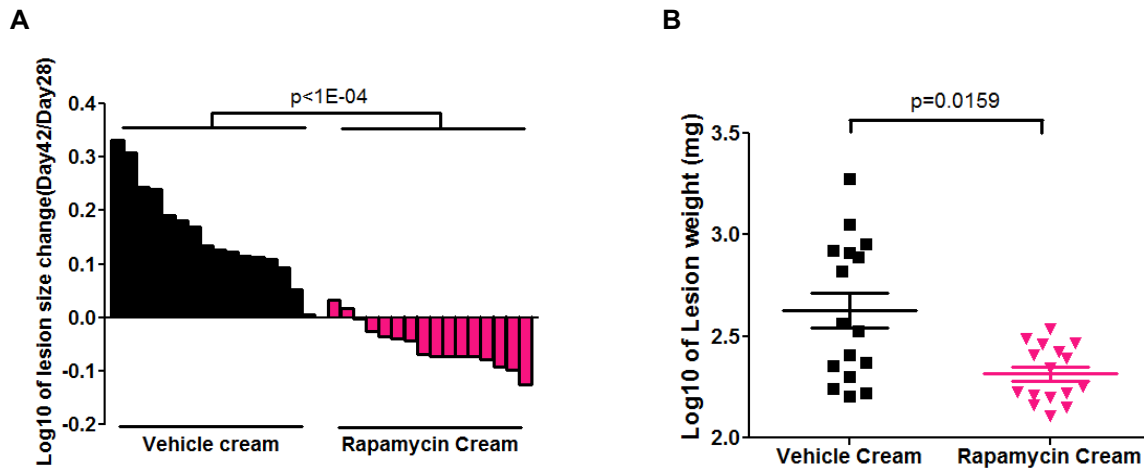

**Supplemental figure X. Topical rapamycin treatment prevents VM lesion rebound.**

**A.** Waterfall plot of lesion size change (Day42/Day28). **B.** Lesion weight at Day42. In A and B data expressed as log10 of single value for each lesion, mean shown by horizontal bars, linear mixed model effect (n = 8 mice with 2 lesions/group).

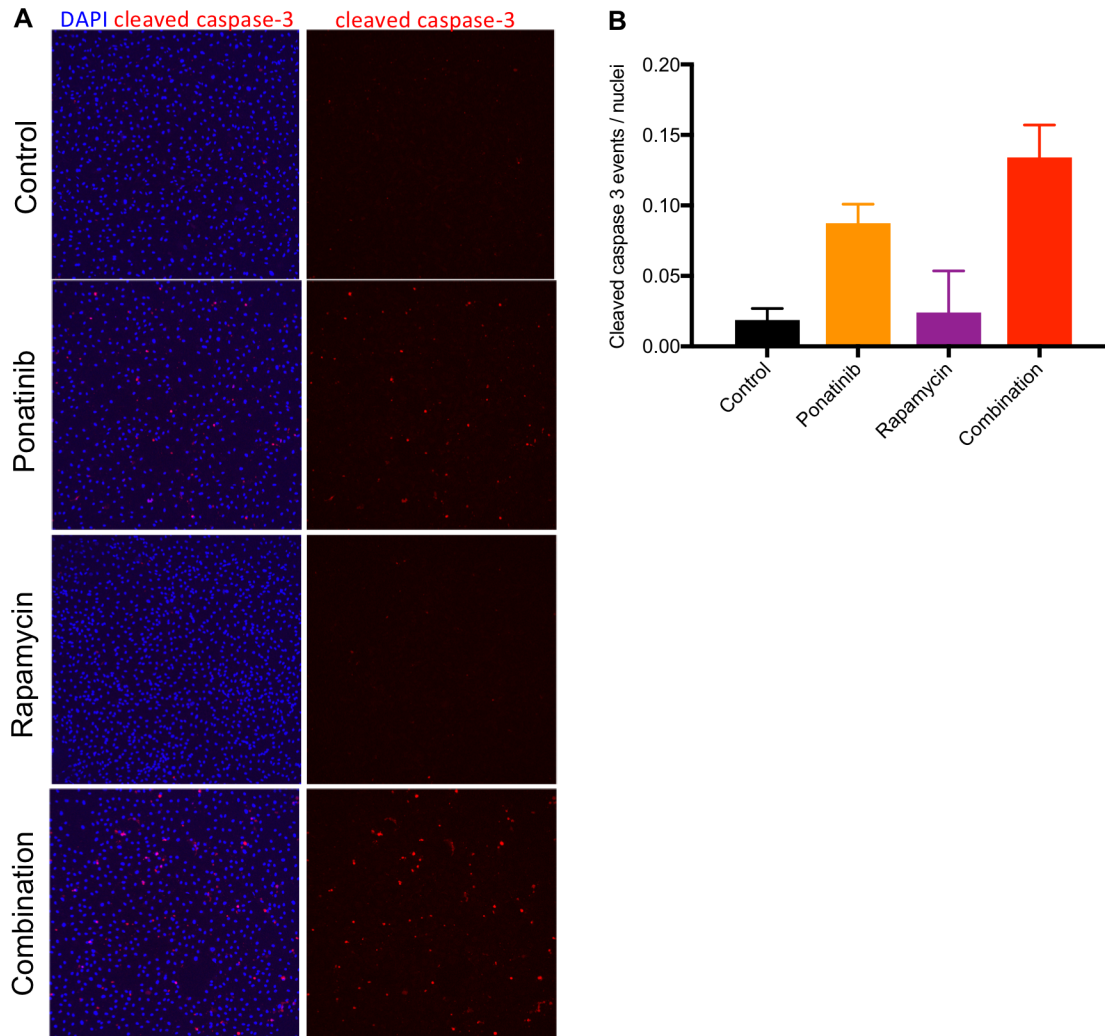

**Supplemental figure XI. Combination treatment with Ponatinib and rapamycin increases apoptosis.**

**A.** Representative images of cleaved caspase-3 staining. **B.** Quantification of the ratio of cleaved caspase-3 events (in red) to nuclei (stained with DAPI, in blue). HUVEC-TIE2-L914F cells were treated with DMSO, 300nM Ponatinib, 10nM rapamycin or combination for 72 hours. Data expressed as mean  $\pm$  SD (n = 4).

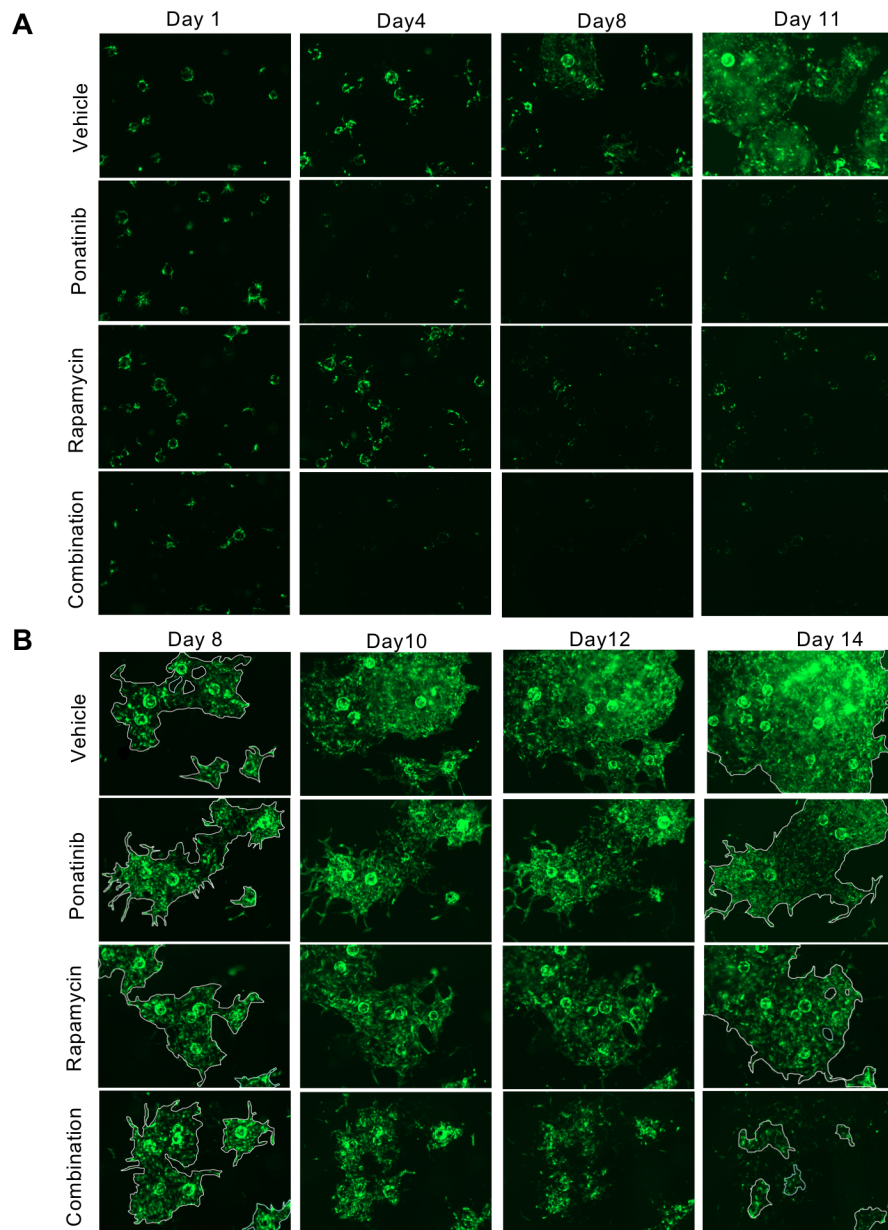

**Supplemental figure XII. Combination treatment with Ponatinib and rapamycin reduces vascular area in a 3D fibrin gel assay.**

**A.** Representative 2D images of HUVEC-TIE2-L914F-GFP tube network formation taken on the same field every 3 days from day 1 to 11. **B.** Representative images of HUVEC-TIE2-L914F-GFP tube network regression taken on the same field every other day from day 8 to 14.

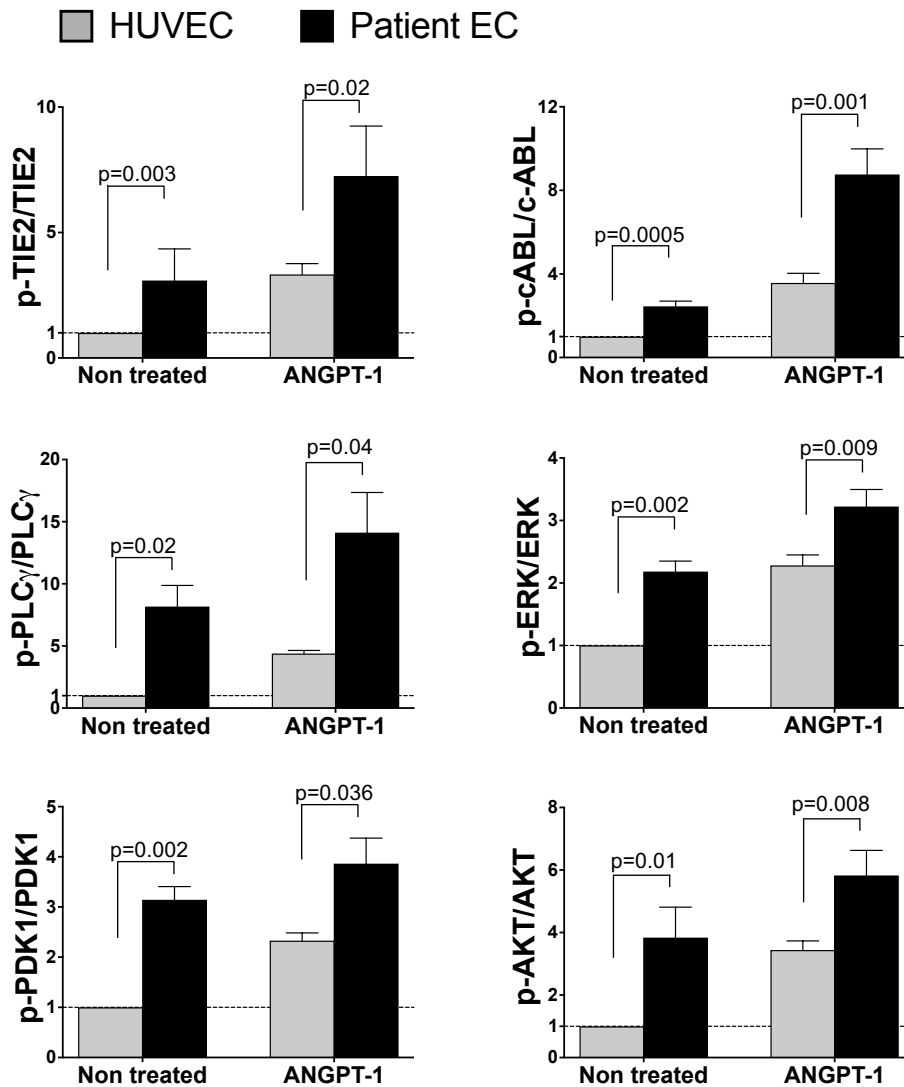

**Supplemental figure XIII. Quantification of active signaling pathways in patient-derived VM-EC.**

Quantification analysis of immunoblotting of HUVEC and patient EC (patient #1 and #2 VM-EC data are combined) with indicated antibodies (representative immunoblot is Fig.8B). Cells were treated with or without 500nM ANGPT1 for 15 minutes. Data are normalized to HUVEC non treated, Student's t-test (n=3-4).



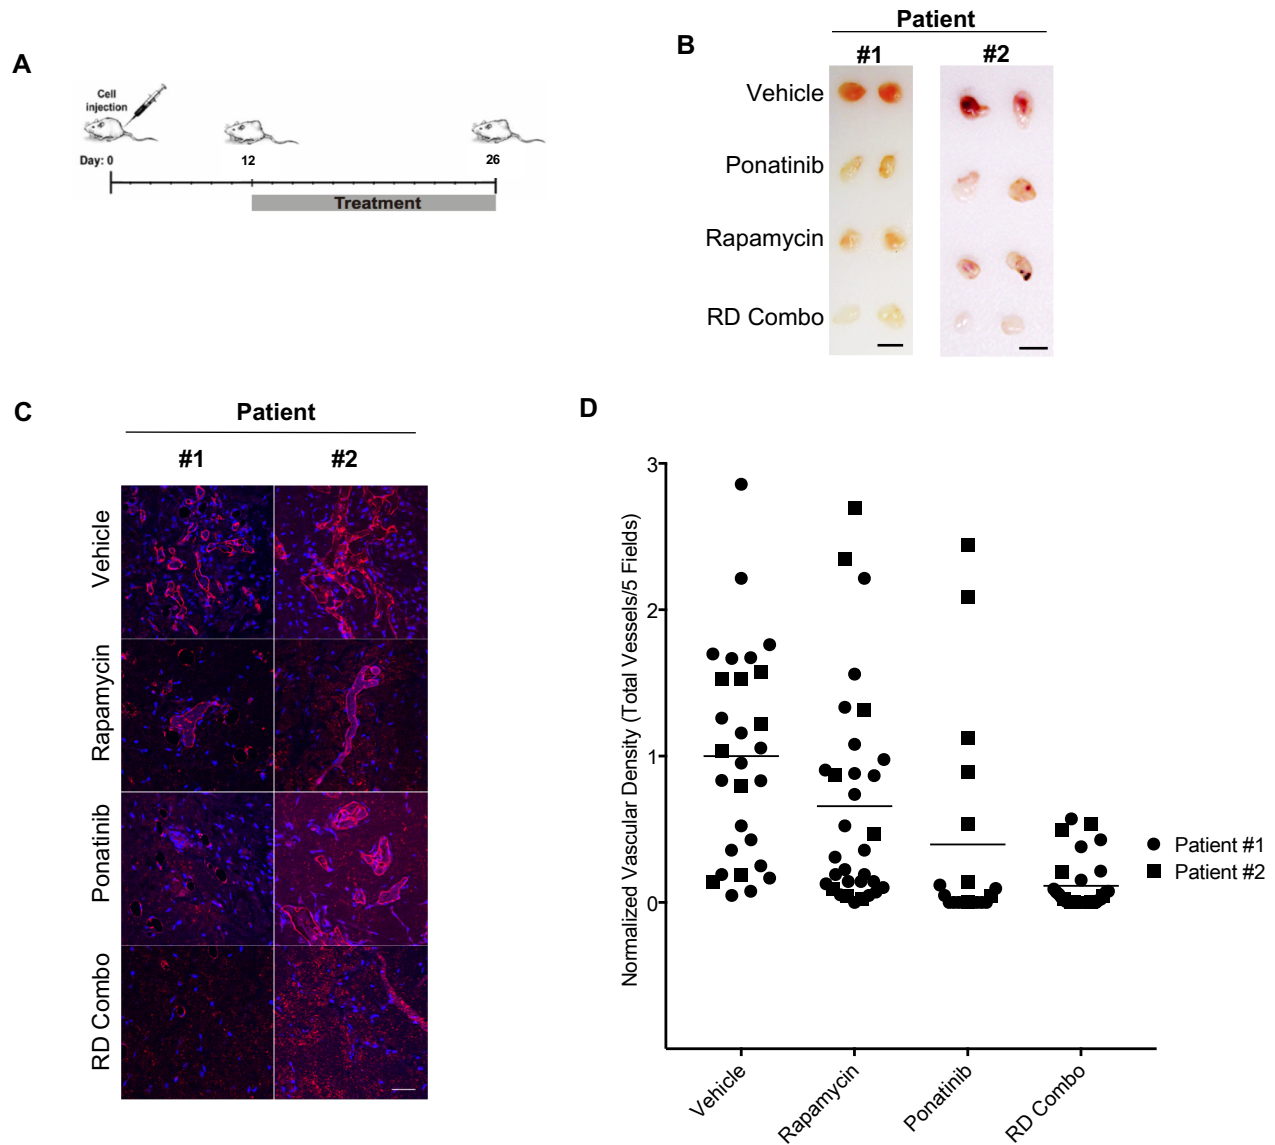

**Supplemental figure XIV. Combination treatment with Ponatinib and rapamycin reduces vascular area in a VM patient-derived xenograft model.**

**A.** VM-EC were injected into mouse at day 0 and treatment was started at day 12 for 14 days. Treatment was daily oral gavage with vehicle, Ponatinib (30mg/kg), rapamycin (2mg/kg) and reduced dose combination (RD Combo, Ponatinib 20mg/kg + rapamycin 1mg/kg). **B.** Representative image of patient (#1 and #2) derived VM-EC xenograft lesions. Scale bar: 1cm. **C.** Representative images of UEA (red) and DAPI (blue) stained sections. Scale bar: 50 $\mu$ m. **D.** Quantification of vascular density. Data expressed as normalized single value for each lesion, mean shown by horizontal bars (n = 6-8 mice/group with 2 lesions/mouse). Circle and square represent VM-lesion from patient #1 and patient #2 respectively.

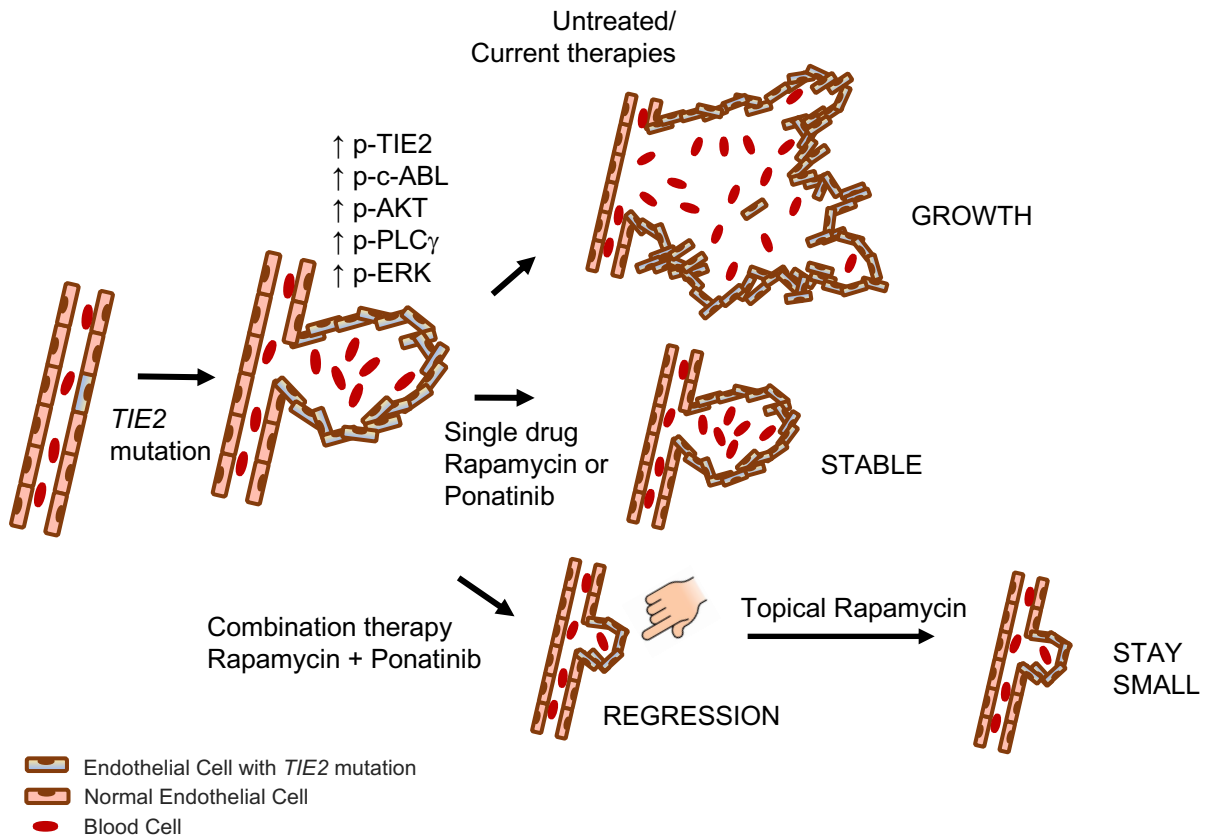

**Supplemental figure XV. Schematic model of combination therapy for the treatment of VM.**

A *TIE2*-L914F mutation in one or a small subset of EC is sufficient to induce the formation of Venous Malformation (VM). Mutant VM EC show constitutive activation of *TIE2* and downstream AKT and c-ABL (novel finding of this manuscript), and drive lumen enlargement that leads to massive blood vessel expansion. In this manuscript, we show that monotherapy treatment with Rapamycin or Ponatinib results in blood vessel stabilization (no expansion), moreover when Ponatinib and rapamycin are combined a significant regression in VM lesion size occurs. Furthermore, topical rapamycin can prevent VM lesion rebound due to oral drug combination withdrawal.

| DRUG NAME (USA)               | Average proliferation Inhibition rate (%) |             |             | P value<br>(compare<br>L914F with<br>HUVEC) | P value<br>(compare<br>L914F<br>with WT) | Targets                                                            |
|-------------------------------|-------------------------------------------|-------------|-------------|---------------------------------------------|------------------------------------------|--------------------------------------------------------------------|
|                               | L914F                                     | NT          | WT          |                                             |                                          |                                                                    |
| Bortezomib                    | 81.02±0.89                                | 81.03±5.14  | 69.51±7.04  | 1.000                                       | 0.065                                    | proteasome inhibitor                                               |
| Enzalutamide                  | 80.92±1.44                                | 82.91±2.91  | 66.47±9.64  | 0.346                                       | 0.079                                    | androgen receptor antagonist drug                                  |
| Ixabepilone                   | 79.66±3.72                                | 74.27±3.46  | 60.18±5.63  | 0.116                                       | 0.004                                    | antimicrotubules                                                   |
| Crizotinib                    | 78.52±3.35                                | 63.84±1.51  | 64.75±11.63 | 0.002                                       | 0.130                                    | ALK and ROS1 inhibitor                                             |
| Carfilzomib                   | 76.82±5.78                                | 69.65±10.70 | 65.03±6.67  | 0.358                                       | 0.061                                    | proteasome inhibitor                                               |
| Ceritinib                     | 76.61±1.43                                | 12.43±13.48 | 15.47±17.03 | 0.004                                       | 0.008                                    | ALK inhibitor                                                      |
| Ponatinib                     | 75.54±2.74                                | 26.65±14.27 | 50.75±12.14 | 0.008                                       | 0.035                                    | tyrosine kinase inhibitor(BCR-Abl)                                 |
| Omacetaxine mepesuccinate     | 74.10±2.26                                | 79.78±1.33  | 67.59±6.99  | 0.014                                       | 0.207                                    | protein translation inhibitor                                      |
| Cabozantinib                  | 73.71±6.62                                | 32.03±6.09  | 58.30±5.03  | 0.000                                       | 0.020                                    | multi-targeted RTK inhibitor (c-Met, VEGFR)                        |
| Mitoxantrone                  | 73.58±1.67                                | 80.34±3.66  | 69.91±8.73  | 0.041                                       | 0.522                                    | type II topoisomerase inhibitor                                    |
| Daunorubicin hydrochloride    | 70.03±4.09                                | 75.98±5.08  | 57.27±2.00  | 0.168                                       | 0.007                                    | antimetabolites                                                    |
| Mitomycin                     | 69.37±3.23                                | 69.46±8.38  | 53.54±7.03  | 0.986                                       | 0.022                                    | chemotherapeutic agents                                            |
| Topotecan hydrochloride       | 68.43±3.07                                | 77.50±2.36  | 63.84±9.29  | 0.008                                       | 0.467                                    | topoisomerase inhibitor                                            |
| Vandetanib                    | 66.66±5.55                                | 57.75±11.62 | 48.98±3.14  | 0.014                                       | 0.006                                    | multi-targeted RTK inhibitor (VEGFR, EGFR, RET)                    |
| Epirubicin hydrochloride      | 64.66±1.97                                | 74.39±4.94  | 54.67±3.51  | 0.035                                       | 0.009                                    | antimetabolites                                                    |
| Doxorubicin hydrochloride     | 64.48±1.42                                | 73.23±4.36  | 55.44±3.18  | 0.034                                       | 0.010                                    | antimetabolites                                                    |
| Teniposide                    | 63.88±6.46                                | 60.03±3.71  | 49.87±10.98 | 0.414                                       | 0.117                                    | chemotherapeutic agent                                             |
| Dactinomycin                  | 60.39±2.37                                | 66.96±5.62  | 45.02±6.55  | 0.135                                       | 0.021                                    | inhibit transcription                                              |
| Plicamycin                    | 60.14±2.17                                | 65.66±4.17  | 47.75±4.92  | 0.104                                       | 0.015                                    | RNA synthesis inhibitor                                            |
| Temsirolimus                  | 58.26±9.44                                | 41.50±5.39  | 31.50±5.07  | 0.047                                       | 0.009                                    | mTOR inhibitor                                                     |
| Bosutinib                     | 57.65±10.30                               | 35.82±5.54  | 36.20±7.65  | 0.026                                       | 0.030                                    | tyrosine kinase inhibitor (BCR-Abl, Src family kinase)             |
| Belinostat                    | 54.56±4.92                                | 79.38±3.41  | 37.29±10.31 | 0.001                                       | 0.055                                    | histone deacetylase inhibitor                                      |
| Siriolimus                    | 53.86±2.78                                | 43.15±2.85  | 30.27±4.88  | 0.003                                       | 0.001                                    | mTOR inhibitor                                                     |
| Sunitinib                     | 53.00±8.71                                | 34.85±8.76  | 38.55±11.15 | 0.044                                       | 0.130                                    | multi-targeted RTK inhibitor (VEGFR, PDGFR)                        |
| Gemcitabine hydrochloride     | 52.68±2.66                                | 50.73±8.68  | 37.43±11.02 | 0.731                                       | 0.093                                    | DNA synthesis;                                                     |
| Everolimus                    | 50.48±4.75                                | 39.76±3.54  | 28.02±3.93  | 0.038                                       | 0.002                                    | mTOR inhibitor;                                                    |
| Sorafenib                     | 49.65±15.29                               | 13.24±7.39  | 8.77±8.18   | 0.020                                       | 0.013                                    | multi-targeted RTK inhibitor (VEGFR and PDGFR)                     |
| Bleomycin sulfate             | 49.04±3.45                                | 50.88±6.71  | 29.04±2.53  | 0.693                                       | 0.000                                    | antibiotics                                                        |
| Thioguanine                   | 47.63±5.54                                | 13.78±5.10  | 30.81±5.81  | 0.000                                       | 0.011                                    | antimetabolites                                                    |
| Valrubicin                    | 45.35±21.71                               | -4.92±7.16  | 2.82±4.06   | 0.022                                       | 0.040                                    | antibiotic                                                         |
| Pazopanib hydrochloride       | 45.34±21.95                               | 4.01±24.21  | 31.78±22.26 | 0.071                                       | 0.481                                    | multi-targeted RTK inhibitor (VEGFR, PDGFR, FGFR, c-Kit and c-Fms) |
| Clofarabine                   | 44.23±1.93                                | 55.78±7.52  | 35.23±11.44 | 0.073                                       | 0.267                                    | antimetabolites                                                    |
| Paclitaxel                    | 42.90±4.11                                | 47.99±3.25  | 41.64±4.36  | 0.146                                       | 0.727                                    | microtubule inhibitor                                              |
| Vorinostat                    | 42.80±2.50                                | 72.11±6.08  | 30.92±14.92 | 0.002                                       | 0.263                                    | Histone deacetylase inhibitors                                     |
| Azacitidine                   | 42.64±4.84                                | 44.27±6.66  | 31.51±3.90  | 0.744                                       | 0.022                                    | chemotherapeutic agents                                            |
| Afatinib                      | 41.38±31.06                               | 20.01±5.26  | 13.07±2.30  | 0.321                                       | 0.212                                    | multi-targeted RTK inhibitor (EGFR, HER2)                          |
| Dabrafenib mesylate           | 40.95±5.81                                | 22.13±9.95  | -6.26±4.13  | 0.038                                       | 0.000                                    | BRAF inhibitor                                                     |
| Triethylenemelamine           | 40.60±5.76                                | 46.10±7.11  | 20.73±6.02  | 0.341                                       | 0.006                                    | chemotherapeutic agent                                             |
| Cladribine                    | 40.23±3.53                                | 57.01±6.49  | 33.35±11.53 | 0.013                                       | 0.386                                    | antimetabolites                                                    |
| Trametinib                    | 40.22±4.19                                | 34.72±1.51  | -0.64±5.09  | 0.104                                       | 0.000                                    | MEK inhibitor                                                      |
| Oxaliplatin                   | 39.55±2.37                                | 25.39±2.42  | 13.52±5.20  | 0.000                                       | 0.001                                    | chemotherapeutic agent                                             |
| Vinblastine sulfate           | 35.39±1.69                                | 53.78±2.67  | 43.02±4.33  | 0.000                                       | 0.048                                    | microtubule inhibitor                                              |
| Regorafenib                   | 35.36±3.79                                | 56.71±4.94  | 34.68±9.16  | 0.001                                       | 0.910                                    | multi-targeted RTK inhibitor (VEGFR2, TIE2)                        |
| Vinorelbine tartrate          | 35.26±3.43                                | 51.59±2.84  | 36.04±5.83  | 0.001                                       | 0.850                                    | microtubule inhibitor                                              |
| Etoposide                     | 34.62±3.82                                | 47.96±5.14  | 26.52±7.47  | 0.013                                       | 0.162                                    | topoisomerase inhibitor                                            |
| Pralatrexate                  | 34.60±34.53                               | -2.94±0.94  | -13.51±5.14 | 0.160                                       | 0.095                                    | folate analogue metabolic inhibitor                                |
| Vincristine sulfate           | 32.81±4.16                                | 49.75±2.60  | 29.41±9.93  | 0.002                                       | 0.613                                    | microtubule inhibitor                                              |
| Fluorouracil                  | 32.67±3.70                                | 20.48±6.08  | 16.43±3.45  | 0.032                                       | 0.001                                    | antimetabolites                                                    |
| Cytarabine hydrochloride      | 30.30±4.96                                | 42.88±12.84 | 27.99±9.66  | 0.191                                       | 0.728                                    | chemotherapeutic agents                                            |
| Romidepsin                    | 29.66±3.66                                | 50.89±2.44  | 39.07±7.70  | 0.000                                       | 0.124                                    | Histone deacetylase inhibitors                                     |
| Axitinib                      | 28.13±12.90                               | 18.51±6.09  | 2.30±11.05  | 0.304                                       | 0.040                                    | multi-targeted RTK inhibitor (VEGFR, c-KIT, PDGFR)                 |
| Gefitinib                     | 26.69±5.05                                | 11.93±4.12  | 19.20±19.54 | 0.008                                       | 0.561                                    | EGFR inhibitor                                                     |
| Ibrutinib                     | 24.52±8.83                                | 31.64±16.99 | 25.81±10.98 | 0.551                                       | 0.880                                    | Bruton's tyrosine kinase                                           |
| Idelalisib                    | 23.39±3.19                                | 23.75±5.89  | 36.19±2.62  | 0.929                                       | 0.002                                    | phosphoinositide 3-kinase inhibitor                                |
| Irinotecan hydrochloride      | 22.26±3.10                                | 44.02±8.12  | 19.37±2.33  | 0.013                                       | 0.247                                    | topoisomerase inhibitor                                            |
| Mechlorethamine hydrochloride | 21.76±2.99                                | 41.12±8.77  | 14.22±6.46  | 0.026                                       | 0.137                                    | chemotherapeutic agents                                            |
| Cabazitaxel                   | 21.15±3.98                                | 40.06±6.34  | 32.37±5.79  | 0.007                                       | 0.037                                    | microtubule inhibitor                                              |
| Floxuridine                   | 19.64±3.56                                | 23.25±2.06  | 10.72±2.36  | 0.192                                       | 0.014                                    | antimetabolites                                                    |
| Docetaxel                     | 18.42±7.10                                | 38.82±6.01  | 31.54±3.95  | 0.009                                       | 0.041                                    | microtubule inhibitor                                              |
| Uracil mustard                | 17.47±3.41                                | 18.80±8.40  | 6.77±3.14   | 0.811                                       | 0.007                                    | chemotherapeutic agents                                            |
| Nilotinib                     | 13.11±4.53                                | -7.48±8.48  | -9.36±7.28  | 0.028                                       | 0.016                                    | tyrosine kinase inhibitor (BCR-Abl, c-KIT, Lck)                    |
| Lomustine                     | 12.00±2.39                                | 12.58±5.16  | 11.37±5.21  | 0.869                                       | 0.856                                    | chemotherapeutic agents                                            |
| Olaparib                      | 11.51±2.51                                | 16.80±7.5   | 10.97±2.08  | 0.317                                       | 0.782                                    | chemotherapeutic agent                                             |
| Mercaptopurine                | 10.90±6.64                                | 6.10±5.02   | 0.45±1.76   | 0.360                                       | 0.068                                    | immunosuppressive drug                                             |
| Chlorambucil                  | 10.85±4.46                                | 22.00±1.90  | 3.69±3.26   | 0.016                                       | 0.070                                    | chemotherapeutic agents                                            |
| Dexrazoxane                   | 10.82±4.08                                | 13.37±6.52  | 5.76±6.04   | 0.589                                       | 0.281                                    | cardioprotective agent                                             |
| Erlotinib hydrochloride       | 10.67±13.50                               | 35.28±16.84 | 25.46±13.32 | 0.098                                       | 0.226                                    | antimetabolites                                                    |
| Tamoxifen citrate             | 10.45±5.96                                | 24.32±19.11 | 37.26±11.75 | 0.304                                       | 0.020                                    | selective estrogen-receptor modulator                              |
| Thiotepa                      | 10.25±7.23                                | 21.58±4.76  | 8.06±1.92   | 0.071                                       | 0.642                                    | chemotherapeutic agents                                            |
| Pipobroman                    | 10.05±1.23                                | 15.75±6.46  | 3.55±4.34   | 0.225                                       | 0.076                                    | chemotherapeutic agents/alkylating agent                           |
| Melphalan hydrochloride       | 9.53±3.93                                 | 11.09±5.24  | -1.25±2.16  | 0.694                                       | 0.010                                    | alkylating agents                                                  |
| Decitabine                    | 8.76±2.58                                 | 3.11±3.23   | -1.12±5.45  | 0.058                                       | 0.043                                    | DNA methyltransferase inhibitor                                    |
| Raloxifene                    | 7.46±1.71                                 | 9.41±7.33   | 28.24±26.13 | 0.681                                       | 0.262                                    | selective estrogen receptor modulator (SERM)                       |
| Carmustine                    | 7.11±6.51                                 | 11.20±3.21  | 3.32±2.51   | 0.380                                       | 0.401                                    | chemotherapeutic agents                                            |
| Exemestane                    | 6.56±2.99                                 | 5.08±3.26   | -4.29±2.60  | 0.585                                       | 0.003                                    | aromatase inhibitors                                               |
| Lapatinib                     | 6.44±5.74                                 | -2.48±5.78  | -3.81±7.41  | 0.107                                       | 0.110                                    | multi-targeted RTK inhibitor (HER2, EGFR)                          |
| Letrozole                     | 6.07±3.14                                 | 4.31±6.48   | -0.85±5.95  | 0.693                                       | 0.141                                    | Aromatase inhibitors                                               |
| Dasatinib                     | 6.05±14.11                                | 18.57±13.42 | 16.99±9.69  | 0.308                                       | 0.316                                    | multi- BCR/Abl and Src family tyrosine kinase inhibitor            |
| Procabazine hydrochloride     | 6.02±7.28                                 | 0.84±5.66   | -3.53±1.96  | 0.370                                       | 0.105                                    | chemotherapeutic agents                                            |
| Perifoxa                      | 5.99±3.13                                 | 3.15±4.91   | -2.43±2.55  | 0.436                                       | 0.012                                    | immunostimulant                                                    |
| Celecoxib                     | 5.55±4.73                                 | 0.37±5.65   | -10.16±5.65 | 0.270                                       | 0.011                                    | COX-2 selective nonsteroidal anti-inflammatory drug                |
| Abiraterone                   | 5.33±9.30                                 | -6.50±4.67  | -7.15±1.25  | 0.114                                       | 0.102                                    | antiandrogen activity                                              |
| Pemetrexed disodium salt      | 5.13±3.08                                 | 2.48±4.32   | -2.57±4.77  | 0.424                                       | 0.064                                    | chemotherapy drugs called folate antimetabolites                   |
| Mitotane                      | 4.55±2.29                                 | 1.39±4.88   | -0.12±2.25  | 0.365                                       | 0.045                                    | antimetabolites                                                    |
| Ifosfamide                    | 4.47±5.64                                 | -3.81±1.30  | -0.66±3.83  | 0.081                                       | 0.247                                    | chemotherapeutic agents                                            |

|                                   |             |             |             |       |       |                                                                          |
|-----------------------------------|-------------|-------------|-------------|-------|-------|--------------------------------------------------------------------------|
| Lenalidomide                      | 4.46±2.50   | 1.27±8.73   | -2.09±4.04  | 0.580 | 0.063 | anti-tumor effect, inhibition of angiogenesis, and immunomodulatory role |
| Anastrozole                       | 3.95±4.02   | 4.23±8.05   | -1.07±4.15  | 0.960 | 0.183 | aromatase inhibitors                                                     |
| Fulvestrant                       | 3.89±4.72   | -4.95±2.87  | -2.52±8.38  | 0.040 | 0.304 | estrogen receptor antagonist                                             |
| Idarubicin hydrochloride          | 3.36±2.99   | 1.79±6.96   | -4.82±3.36  | 0.737 | 0.020 | antitumor antibiotics.                                                   |
| Nelarabine                        | 3.00±3.31   | 4.75±5.71   | -0.28±1.34  | 0.667 | 0.188 | chemotherapeutic agents                                                  |
| Megestrol acetate                 | 2.95±4.32   | 1.49±4.47   | -7.37±3.75  | 0.700 | 0.021 | potent agonist of the progesterone receptor                              |
| Cyclophosphamide                  | 2.88±5.30   | -1.06±4.30  | -4.00±3.45  | 0.357 | 0.117 | chemotherapeutic agents                                                  |
| Imiquimod                         | 2.68±3.32   | -0.75±3.89  | -3.32±4.11  | 0.290 | 0.099 | immune response modifier (IRM)                                           |
| Bendamustine hydrochloride        | 2.12±3.14   | 3.19±5.22   | -0.61±2.47  | 0.774 | 0.284 | chemotherapeutic agents/alkylating agent                                 |
| Imatinib                          | 1.90±4.30   | 12.44±23.61 | -5.42±4.44  | 0.499 | 0.086 | multi-targeted RTK inhibitor (BCR-Abl, c-KIT, PDGFR)                     |
| Vismodegib                        | 1.57±4.46   | -1.48±5.81  | -9.97±2.25  | 0.499 | 0.013 | antagonist of the smoothened receptor (SMO)                              |
| Carboplatin                       | 1.26±2.89   | 3.77±1.74   | -3.94±2.60  | 0.255 | 0.060 | chemotherapeutic agent                                                   |
| Fludarabine phosphate             | 1.21±1.08   | 0.14±5.94   | -2.30±3.90  | 0.778 | 0.218 | chemotherapeutic agents                                                  |
| Cisplatin                         | 1.15±2.87   | -4.42±4.54  | -6.87±5.51  | 0.278 | 0.158 | chemotherapeutic agents                                                  |
| Capecitabine                      | 1.06±7.33   | 0.47±5.83   | -1.49±3.55  | 0.876 | 0.326 | chemotherapeutic agents                                                  |
| Vemurafenib                       | 0.70±3.13   | -8.56±2.96  | -4.40±5.67  | 0.060 | 0.230 | B-Raf inhibitor                                                          |
| Amifostine                        | 0.66±4.19   | -8.91±7.17  | -11.51±3.99 | 0.157 | 0.057 | cytoprotective adjuvant                                                  |
| Busulfan                          | 0.26±1.91   | 1.68±2.47   | 0.46±3.24   | 0.560 | 0.940 | chemotherapeutic agents                                                  |
| Tretinoin                         | 0.11±4.76   | -3.57±2.74  | -7.14±6.55  | 0.257 | 0.166 | retinoic acid receptors agonist                                          |
| Methoxsalen                       | -0.04±1.91  | -1.93±2.06  | -1.69±3.24  | 0.289 | 0.482 | furanocoumarins                                                          |
| Allopurinol                       | -0.18±4.76  | 1.79±4.53   | -1.38±2.80  | 0.621 | 0.723 | antimetabolites                                                          |
| Arsenic trioxide                  | -0.26±2.86  | 1.49±3.99   | 2.81±4.60   | 0.562 | 0.371 | unclear                                                                  |
| Zoledronic acid                   | -0.37±4.93  | -8.23±9.55  | -11.71±5.29 | 0.267 | 0.035 | anti-bone-resorption                                                     |
| Streptozocin                      | -0.95±6.61  | -5.23±5.62  | -5.84±6.97  | 0.427 | 0.412 | chemotherapeutic agents                                                  |
| Temozolomide                      | -1.03±2.84  | 3.01±3.34   | 0.12±3.03   | 0.162 | 0.649 | chemotherapeutic agents                                                  |
| Aminolevulinic acid hydrochloride | -1.31±5.00  | 3.76±6.35   | -3.60±4.41  | 0.321 | 0.575 | porphyrin synthesis inhibitor                                            |
| Pomalidomide                      | -1.48±5.61  | 5.37±5.50   | -4.53±2.86  | 0.182 | 0.445 | inhibition of angiogenesis, and immunomodulatory role                    |
| Thalidomide                       | -2.35±5.55  | -1.60±8.12  | -5.38±2.54  | 0.900 | 0.437 | immunomodulatory drug                                                    |
| Estramustine phosphate sodium     | -2.46±3.51  | -4.58±1.90  | -3.54±11.35 | 0.403 | 0.883 | antimicrotubule                                                          |
| Pentostatin                       | -2.59±3.70  | -3.07±3.80  | -5.53±4.48  | 0.880 | 0.416 | chemotherapeutic agents                                                  |
| Hydroxyurea                       | -2.83±3.89  | -2.21±6.97  | -1.53±1.92  | 0.898 | 0.630 | antimetabolites                                                          |
| Methotrexate                      | -2.85±13.31 | -3.40±8.89  | -7.58±6.88  | 0.955 | 0.610 | antimetabolites                                                          |
| Altretamine                       | -3.57±4.87  | 2.67±4.32   | -0.88±4.13  | 0.120 | 0.493 | chemotherapeutic agents                                                  |
| Dacarbazine                       | -3.94±2.38  | 1.88±5.20   | -3.57±1.78  | 0.150 | 0.839 | alkylating agents                                                        |

### Supplementary Table I. Cell-based drug screening assay results.

This table includes proliferation inhibition rates of 119 FDA approved drugs at 20  $\mu$ M in HUVEC-TIE2-L914F, -TIE2-wild type (WT) and non transfected (NT).

| Compounds           | IC50 ( $\mu$ M) |           |           | Targets                                        |
|---------------------|-----------------|-----------|-----------|------------------------------------------------|
|                     | L914F           | WT        | NT        |                                                |
| Sirolimus           | <0.03           | <0.03     | <0.03     | mTOR inhibitor                                 |
| Temsirolimus        | <0.03           | <0.03     | <0.03     |                                                |
| Everolimus          | <0.03           | <0.03     | <0.03     |                                                |
| Ponatinib           | 0.42±0.03       | 0.89±0.24 | 1.26±0.42 | BCR-Abl inhibitor                              |
| Bosutinib           | 3.54±1.14       | 4.1±0.68  | 5.16±1.85 |                                                |
| Nilotinib           | 3.61±0.03       | 4.98±0.90 | 6.39±1.18 |                                                |
| Cabozantinib        | 3.06±0.27       | 2.89±1.16 | 1.35±0.20 | multi-targeted RTK inhibitor(c-Met, VEGFR)     |
| Vandetanib          | >10             | 5.63±0.24 | 6.20±0.95 | multi-targeted RTK inhibitor (VEGFR,EGFR, RET) |
| Sorafenib           | >10             | >10       | 6.84±2.23 | multi-targeted RTK inhibitor(VEGFR, PDGFR)     |
| Ceritinib           | 9.03±1.38       | 8.66±2.98 | 8.13±2.65 | ALK inhibitor                                  |
| Dabrafenib mesylate | >10             | >10       | >10       | BRAF inhibitor                                 |

### Supplementary Table II. List of candidate drugs and IC50 values.

This table includes IC50 values of 11 candidate drugs in HUVEC-TIE2-L914F, -TIE2-wild type (WT) and non transfected (NT), in a 6 dose dilution (from 10 to 0.03  $\mu$ M) assay. IC50 of several drugs could not be confirmed as the value were out of the concentration range tested.

| Rapamycin         | Ponatinib |           |           | Nilotinib |           |           | Bosutinib |           |           |
|-------------------|-----------|-----------|-----------|-----------|-----------|-----------|-----------|-----------|-----------|
|                   | L914F     | WT        | NT        | L914F     | WT        | NT        | L914F     | WT        | NT        |
| Combination Index | 0.67±0.26 | 0.74±0.32 | 0.89±0.24 | 0.8±0.28  | 0.58±0.15 | 0.71±0.27 | 1.49±0.31 | 1.72±0.41 | 1.47±0.41 |

**Supplementary Table III. Combination index (CI) values.**

This table includes Combination Index (CI) value of three ABL kinase inhibitors combined with rapamycin in HUVEC-TIE2-L914F, -TIE2-wild type (WT) and non transfected (NT).

## Major Resources Tables

### Animals (in vivo studies)

| Species | Vendor or Source | Background Strain | Sex  |
|---------|------------------|-------------------|------|
| mouse   | Envigo           | Nu/nu             | Male |

Note: Nude mice are only acting as a host for the grafted HUVEC-TIE2-L914F and for patient-derived cells, using male mice that do not have the hormone cycling is the best strategy to study vasculogenesis.

### Drugs

| Compound name                    | Vendor or Source                   | Catalog number |
|----------------------------------|------------------------------------|----------------|
| Drug library for in vitro screen | NCI (DTP program) plated compounds |                |
| Ponatinib                        | LC Laboratory                      | P-7022         |
| Bosutinib                        | NCI (DTP program) vialled compound |                |
| Nilotinib                        | NCI (DTP program) vialled compound |                |
| rapamycin                        | LC Laboratory                      | R-5000         |

### Antibodies

| Target antigen    | Vendor or Source | Catalog #  | Working concentration | Lot # (preferred but not required) |
|-------------------|------------------|------------|-----------------------|------------------------------------|
| p-cABL            | Cell Signaling   | 2868       | 0.4 µg/ml             | 6                                  |
| c-ABL             | Cell Signaling   | 2862       | 1.5 µg/ml             | 16                                 |
| ARG               | Novus Biological | NBP1-18875 | 1 µg/ml               | A1                                 |
| p-TIE2            | Cell Signaling   | 4221       | 0.002 µg/ml           | 4                                  |
| TIE2              | Cell Signaling   | 7403       | 0.175 µg/ml           | 1                                  |
| p-AKT (Ser 473)   | Cell Signaling   | 4060       | 0.05 µg/ml            | 23                                 |
| p-AKT (Thr 308)   | Cell Signaling   | 2965       | 0.35 µg/ml            | 18                                 |
| AKT               | Cell Signaling   | 9272       | 0.04 µg/ml            | 27                                 |
| p-ERK             | Cell Signaling   | 4370       | 0.17 µg/ml            | 17                                 |
| ERK               | Cell Signaling   | 9102       | 0.02 µg/ml            | 27                                 |
| p-PLCg            | Cell Signaling   | 2821       | 0.08 µg/ml            | 9                                  |
| PLCg              | Cell Signaling   | 2822       | 0.06 µg/ml            | 5                                  |
| p-PDK1            | Cell Signaling   | 3061       | 0.008 µg/ml           | 3                                  |
| PDK1              | Cell Signaling   | 3062       | 0.1 µg/ml             | 12                                 |
| Tubulin           | Sigma            | T9026      | 10 µg/ml              | 083M4847V                          |
| β-Actin           | Sigma            | A5441      | 1 µg/ml               | 014M4759                           |
| Cleaved Caspase-3 | Cell Signaling   | 9661S      | 2 µg/ml               | 43                                 |
| Ki-67             | Abcam            | ab66155    | 1 µg/ml               | GR134821-14                        |
| UEA               | VectorLabs       | B-1065     | 20 µg/ml              | Z0806                              |
| CD31              | Dako             | M082329-2  | 2 µg/ml               | 20036220                           |

### Cultured Cells

| Name                                                           | Vendor or Source           | Sex (F, M, or unknown) |
|----------------------------------------------------------------|----------------------------|------------------------|
| HUVEC-TIE2-L914F                                               | Mikka Vikkula's laboratory | unknown                |
| HUVEC-TIE2-WT                                                  | Mikka Vikkula's laboratory | unknown                |
| HUVEC-NT                                                       | Mikka Vikkula's laboratory | unknown                |
| VM patient derived endothelial cells (Patient#1 and Patient#2) | VM patient lesional tissue | Male and Female        |

## Immunostaining Negative Controls

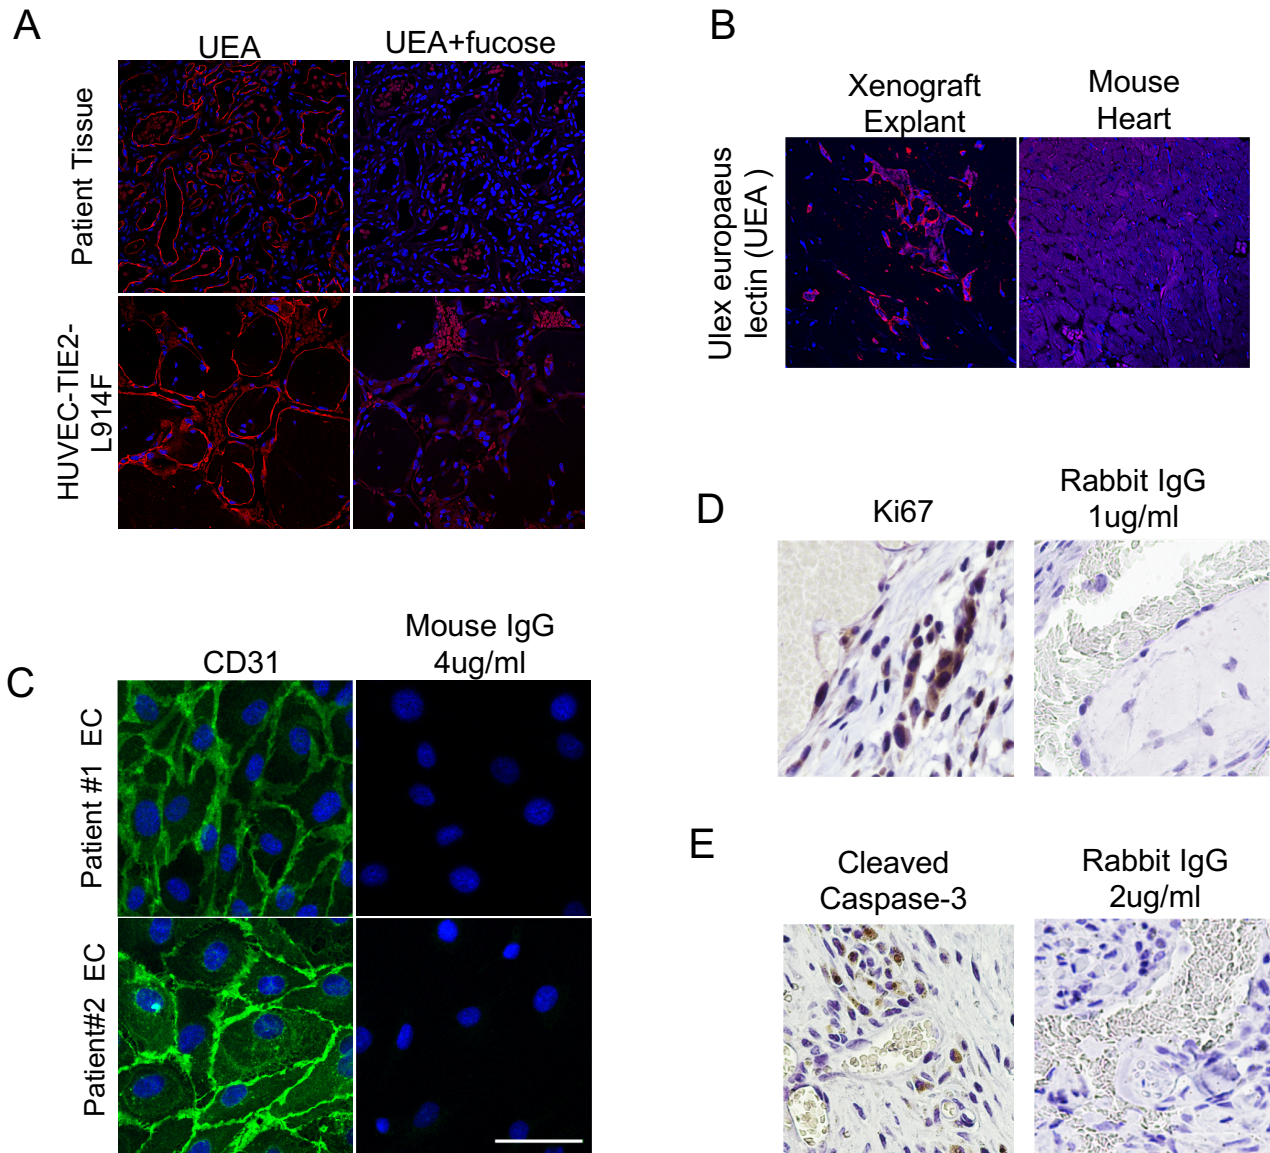

### Immunostaining Negative Controls.

**A.** Immunofluorescent staining for Ulex europaeus agglutinin I (UEA) in red and DAPI in blue (left). We stained vascular anomaly patient tissue (top) and HUVEC-TIE2-L914F-derived VM lesion in mouse (bottom). Fucose was added as a negative control as it binds to UEA (right).

**B.** Immunofluorescent staining for Ulex europaeus agglutinin I (UEA) in red and DAPI in blue. We stained patient-derived VM-EC xenograft explant (left) and mouse heart (right) to show specificity of UEA for human-derived endothelium.

**C.** Immunofluorescent staining for CD31 in green and DAPI in blue (left) or mouse IgG in green and DAPI (right). We stained patient-derived VM-EC monolayer, patient#1 (top), patient#2 (bottom).

**D.** Immunohistochemical staining for Ki-67 (left) and rabbit IgG (right) on HUVEC-TIE2-L914F-derived VM lesion in mouse.

**E.** Immunohistochemical staining for Cleaved Caspase-3 (left) and rabbit IgG (right) on HUVEC-TIE2-L914F-derived VM lesion in mouse.
