# Supplementary material for: Ponatinib Combined With Rapamycin Causes Regression of Murine Venous Malformation
Source: PubMed Central journal article supplement — Arterioscler Thromb Vasc Biol. 2019 Jan 10;39(3):496–512. doi: 10.1161/ATVBAHA.118.312315 (PMC6392210; doi:10.1161/atvbaha.118.312315), 2019-01-10
Supplement: atv-39-496-s002.pdf [file atv-39-496-s002.pdf]

## Major Resources Tables

### Animals (in vivo studies)

| Species | Vendor or Source | Background Strain | Sex  |
|---------|------------------|-------------------|------|
| mouse   | Envigo           | Nu/nu             | Male |

Note: Nude mice are only acting as a host for the grafted HUVEC-TIE2-L914F and for patient-derived cells, using male mice that do not have the hormone cycling is the best strategy to study vasculogenesis.

### Drugs

| Compound name                    | Vendor or Source                   | Catalog number |
|----------------------------------|------------------------------------|----------------|
| Drug library for in vitro screen | NCI (DTP program) plated compounds |                |
| Ponatinib                        | LC Laboratory                      | P-7022         |
| Bosutinib                        | NCI (DTP program) vialled compound |                |
| Nilotinib                        | NCI (DTP program) vialled compound |                |
| rapamycin                        | LC Laboratory                      | R-5000         |

### Antibodies

| Target antigen    | Vendor or Source | Catalog #  | Working concentration | Lot # (preferred but not required) |
|-------------------|------------------|------------|-----------------------|------------------------------------|
| p-cABL            | Cell Signaling   | 2868       | 0.4 µg/ml             | 6                                  |
| c-ABL             | Cell Signaling   | 2862       | 1.5 µg/ml             | 16                                 |
| ARG               | Novus Biological | NBP1-18875 | 1 µg/ml               | A1                                 |
| p-TIE2            | Cell Signaling   | 4221       | 0.002 µg/ml           | 4                                  |
| TIE2              | Cell Signaling   | 7403       | 0.175 µg/ml           | 1                                  |
| p-AKT (Ser 473)   | Cell Signaling   | 4060       | 0.05 µg/ml            | 23                                 |
| p-AKT (Thr 308)   | Cell Signaling   | 2965       | 0.35 µg/ml            | 18                                 |
| AKT               | Cell Signaling   | 9272       | 0.04 µg/ml            | 27                                 |
| p-ERK             | Cell Signaling   | 4370       | 0.17 µg/ml            | 17                                 |
| ERK               | Cell Signaling   | 9102       | 0.02 µg/ml            | 27                                 |
| p-PLCg            | Cell Signaling   | 2821       | 0.08 µg/ml            | 9                                  |
| PLCg              | Cell Signaling   | 2822       | 0.06 µg/ml            | 5                                  |
| p-PDK1            | Cell Signaling   | 3061       | 0.008 µg/ml           | 3                                  |
| PDK1              | Cell Signaling   | 3062       | 0.1 µg/ml             | 12                                 |
| Tubulin           | Sigma            | T9026      | 10 µg/ml              | 083M4847V                          |
| β-Actin           | Sigma            | A5441      | 1 µg/ml               | 014M4759                           |
| Cleaved Caspase-3 | Cell Signaling   | 9661S      | 2 µg/ml               | 43                                 |
| Ki-67             | Abcam            | ab66155    | 1 µg/ml               | GR134821-14                        |
| UEA               | VectorLabs       | B-1065     | 20 µg/ml              | Z0806                              |
| CD31              | Dako             | M082329-2  | 2 µg/ml               | 20036220                           |

### Cultured Cells

| Name                                                           | Vendor or Source           | Sex (F, M, or unknown) |
|----------------------------------------------------------------|----------------------------|------------------------|
| HUVEC-TIE2-L914F                                               | Mikka Vikkula's laboratory | unknown                |
| HUVEC-TIE2-WT                                                  | Mikka Vikkula's laboratory | unknown                |
| HUVEC-NT                                                       | Mikka Vikkula's laboratory | unknown                |
| VM patient derived endothelial cells (Patient#1 and Patient#2) | VM patient lesional tissue | Male and Female        |

## Immunostaining Negative Controls

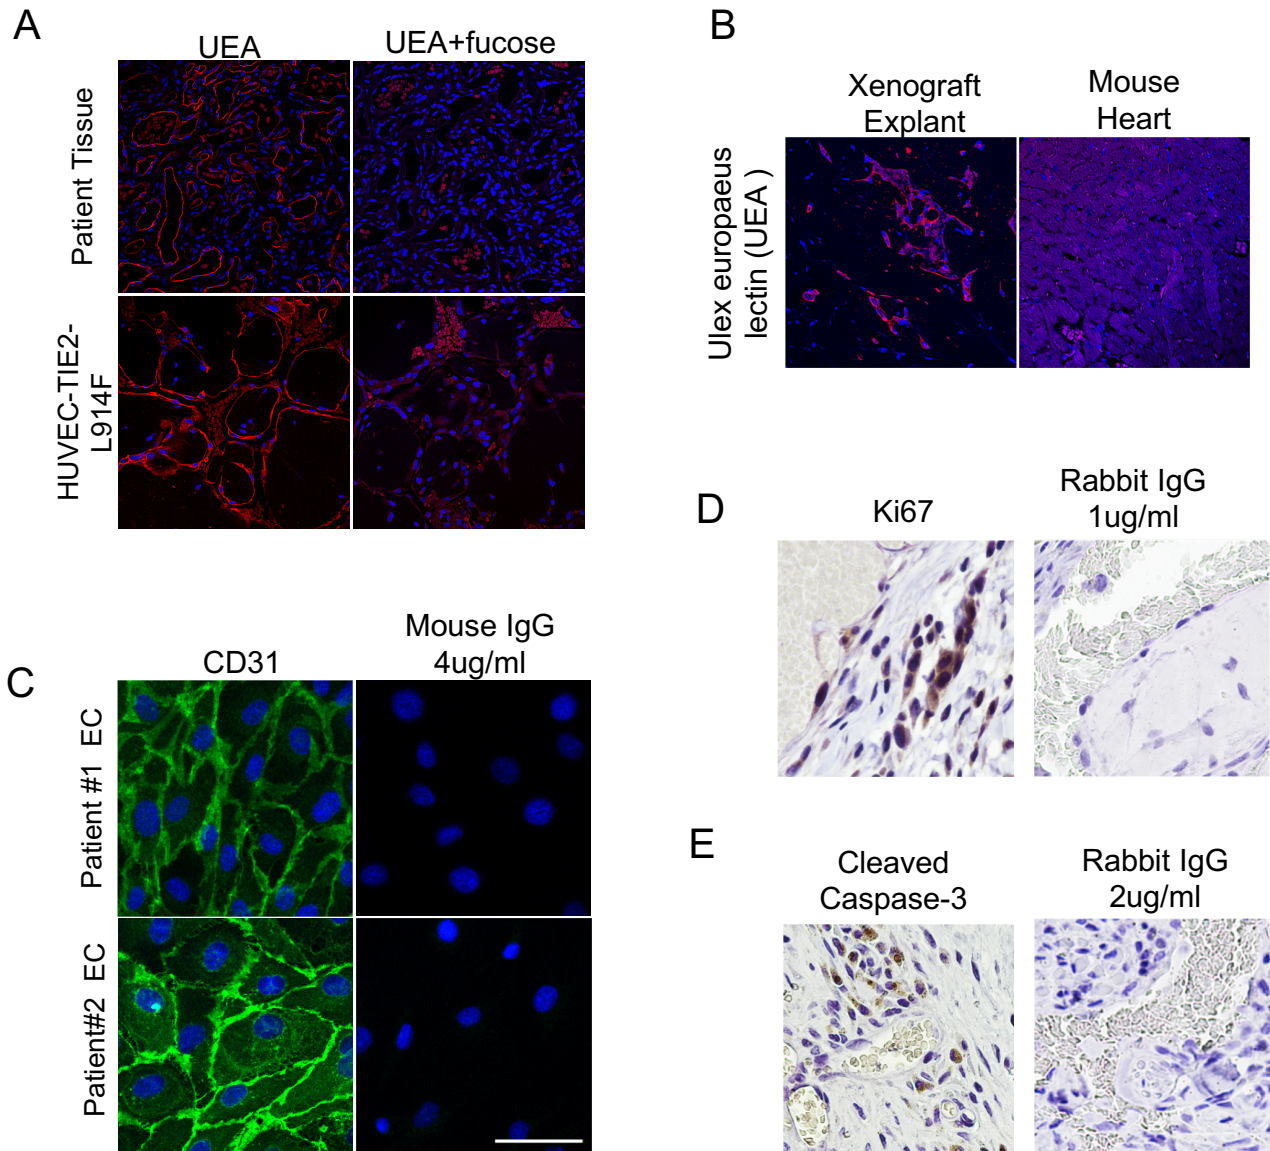

### Immunostaining Negative Controls.

**A.** Immunofluorescent staining for Ulex europaeus agglutinin I (UEA) in red and DAPI in blue (left). We stained vascular anomaly patient tissue (top) and HUVEC-TIE2-L914F-derived VM lesion in mouse (bottom). Fucose was added as a negative control as it binds to UEA (right).

**B.** Immunofluorescent staining for Ulex europaeus agglutinin I (UEA) in red and DAPI in blue. We stained patient-derived VM-EC xenograft explant (left) and mouse heart (right) to show specificity of UEA for human-derived endothelium.

**C.** Immunofluorescent staining for CD31 in green and DAPI in blue (left) or mouse IgG in green and DAPI (right). We stained patient-derived VM-EC monolayer, patient#1 (top), patient#2 (bottom).

**D.** Immunohistochemical staining for Ki-67 (left) and rabbit IgG (right) on HUVEC-TIE2-L914F-derived VM lesion in mouse.

**E.** Immunohistochemical staining for Cleaved Caspase-3 (left) and rabbit IgG (right) on HUVEC-TIE2-L914F-derived VM lesion in mouse.
