# Supplementary figures and images for: Ponatinib Combined With Rapamycin Causes Regression of Murine Venous Malformation
Source: PubMed Central journal article supplement — Arterioscler Thromb Vasc Biol. 2019 Jan 10;39(3):496–512. doi: 10.1161/ATVBAHA.118.312315 (PMC6392210; doi:10.1161/atvbaha.118.312315), 2019-01-10

# GRAPHICAL ABSTRACT

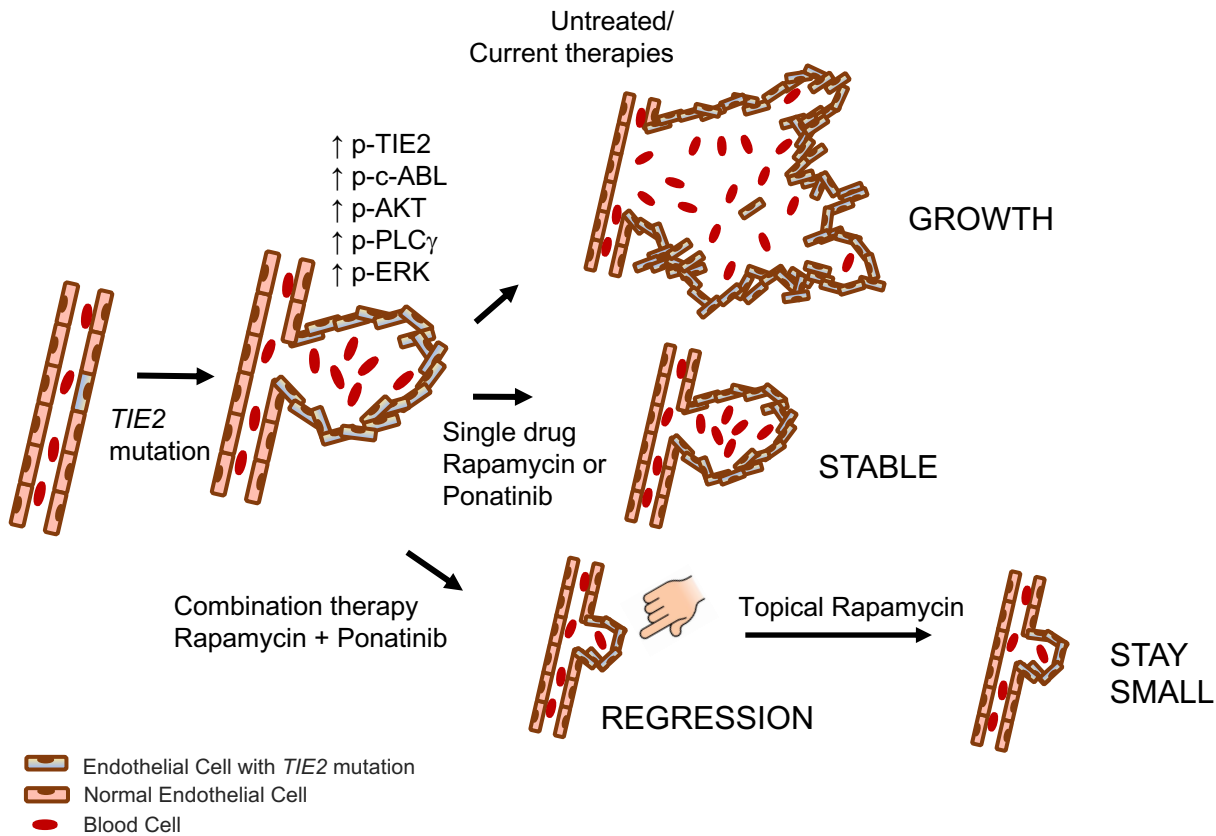

Supplement: atv-39-496-s003.pdf [file atv-39-496-s003.pdf]
